## Mapping of cis-regulatory variants by differential allelic expression analysis identifies candidate causal variants and target genes of 41 breast cancer risk loci

Joana M. Xavier<sup>1,¶</sup>, Ramiro Magno<sup>1</sup>, Roslin Russell<sup>2,‡</sup>, Bernardo P. de Almeida<sup>3,4,#</sup>, Ana  
5 Jacinta-Fernandes<sup>3</sup>, André Duarte<sup>1</sup>, Mark Dunning<sup>2,§</sup>, Shamith Samarajiwa<sup>5</sup>, Martin  
O'Reilly<sup>2,‡</sup>, António M. Maia<sup>1</sup>, Cátia L. Rocha<sup>3,\*</sup>, Nordiana Rosli<sup>3,6,+</sup>, Bruce A. J. Ponder<sup>2</sup>, Ana  
Teresa Maia.<sup>1,3,¶</sup>

### Affiliations:

- 10 1 – Cintesis@Rise, Universidade do Algarve, Faro, Portugal;  
2 – Cambridge Institute - CRUK/University of Cambridge, Cambridge, United Kingdom;  
3 – Faculdade de Medicina e Ciências Biomédicas (FMCB), Universidade do Algarve, Faro,  
Portugal;  
4 – Instituto de Medicina Molecular, Faculdade de Medicina, Universidade de Lisboa,  
15 Lisboa, Portugal;  
5 – Medical Research Council (MRC) Cancer Unit, University of Cambridge, Hutchison/MRC  
Research Centre, Cambridge, United Kingdom;  
6 – Training Division, Ministry of Health Malaysia, Putrajaya, Malaysia;

20

¶ Corresponding Authors: [jgxavier@ualg.pt](mailto:jgxavier@ualg.pt), [atmaia@ualg.pt](mailto:atmaia@ualg.pt)

### Current Addresses:

- 25 ‡ Department of Genetics, University of Cambridge, Cambridge, United Kingdom  
# InstaDeep, Paris, France  
§ Sheffield Institute for Translation Neuroscience (SITraN), University of Sheffield, Sheffield,  
United Kingdom  
‡ MRC Toxicology Unit, Cambridge, United Kingdom  
30 \* Instituto de Saúde Ambiental (ISAMB), Faculty of Medicine, University of Lisbon, Lisbon,  
Portugal  
+ Biometrology Group, Division of Chemical and Biological Metrology, Korea Research  
Institute of Standards and Science, Daejeon, South Korea

NOTE: This preprint reports new research that has not been certified by peer review and should not be used to guide clinical practice.

## ABSTRACT

Genome-wide association studies (GWAS) have identified hundreds of risk loci for breast cancer, but identifying causal variants and candidate target genes remains challenging. Since most risk loci fall in active gene regulatory regions, we developed a novel approach to identify variants with greater regulatory potential in the disease's tissue of origin. Using genome-wide differential allelic expression (DAE) analysis on microarray data from 64 normal breast tissue samples, we mapped over 54K variants associated with DAE (daeQTLs). We then intersected these with GWAS data to reveal candidate risk regulatory variants and analyzed their cis-acting regulatory potential. We found 122 daeQTLs in 41 loci in active regulatory regions that are in strong linkage disequilibrium with risk-associated variants (risk-daeQTLs). We also identified 65 new candidate target genes in 29 of these loci for which no previous candidates existed. As validation, we identified and functionally characterized five candidate causal variants at the 5q14.1 risk locus targeting the *ATG10* and *ATP6AP1L* genes, likely acting via modulation of alternative transcription and transcription factor binding. Our study demonstrates the power of DAE analysis and daeQTL mapping to understand breast cancer genetic risk, including in complex genetic regulatory landscapes. It additionally provides a genome-wide resource of variants associated with DAE for future functional studies.

20

**Keywords:** cis-regulation; polymorphism; cancer predisposition; breast cancer

## INTRODUCTION

Genome-wide association studies (GWAS) for breast cancer (BC) have identified hundreds of risk-associated loci and have generated long lists of candidate loci requiring further validation (Wendt and Margolin, 2019). Nevertheless, the identification of the causal variants and their target genes, as well as understanding the underlying biological mechanisms, remain challenging. This is because disease risk loci often have many variants in high linkage disequilibrium (LD) with the risk-associated variant, harbor multiple genes, and mainly fall in noncoding genome regions (Gallagher and Chen-Plotkin, 2018). However, the overrepresentation of potential causal variants at active gene regulatory regions (Fachal et al., 2020; Maurano et al., 2012) indicates that variants regulating gene expression levels likely influence BC genetic predisposition, both proximally and over a long range (Darabi et al., 2015; Dunning et al., 2016; Ghousaini et al., 2016; Meyer et al., 2011, 2008; Michailidou et al., 2017; Udler et al., 2010). These variants have commonly been mapped by expression quantitative trait loci (eQTL) analysis, but this approach is impacted by the effects of negative feedback control and environmental factors (Pastinen et al., 2006). An increasingly popular alternative approach is to detect imbalances in allelic transcript levels - differential allelic expression (DAE). By comparing the relative expression of the two alleles in a heterozygous individual, each allele will serve as an internal standard for the other, thus controlling for trans-regulatory and environmental factors affecting both alleles (Forton et al., 2007; Ge et al., 2009). Consequently, this directly indicates regulatory variants acting in *cis* - *cis*-acting regulatory SNPs or rSNPs.

Given the importance of *cis*-regulatory variants for BC susceptibility, a genome-wide map of *cis*-regulatory variants would be key to interpreting GWAS results and identifying causal variants of risk. Studies in various healthy tissues showed that DAE is a relatively common event (Aguet et al., 2017; Bjornsson et al., 2008; Gao et al., 2012; Ge et al., 2009; Przytycki and Singh, 2020; Romanel et al., 2015). Given that gene expression regulation is tissue-specific, performing these studies in the tissue from which the disease arises, namely, normal breast tissue, is essential. Although others have used allelic expression analysis to identify BC risk, this was carried out in tumor tissue or lymphoblastoid cells (Hamdi et al., 2014; Zhang et al., 2018). This study proposes an integrative approach to identify causal variants of risk that have a *cis*-regulatory role (Figure 1): to combine GWAS results with SNPs associated with DAE levels in normal breast tissue. Hence, we first carried out DAE analysis in normal breast tissue samples at a genome-wide level, then mapped the candidate risk regulatory variants for GWAS loci, and finally functionally unveiled the mechanisms underlying BC risk at a selected locus.

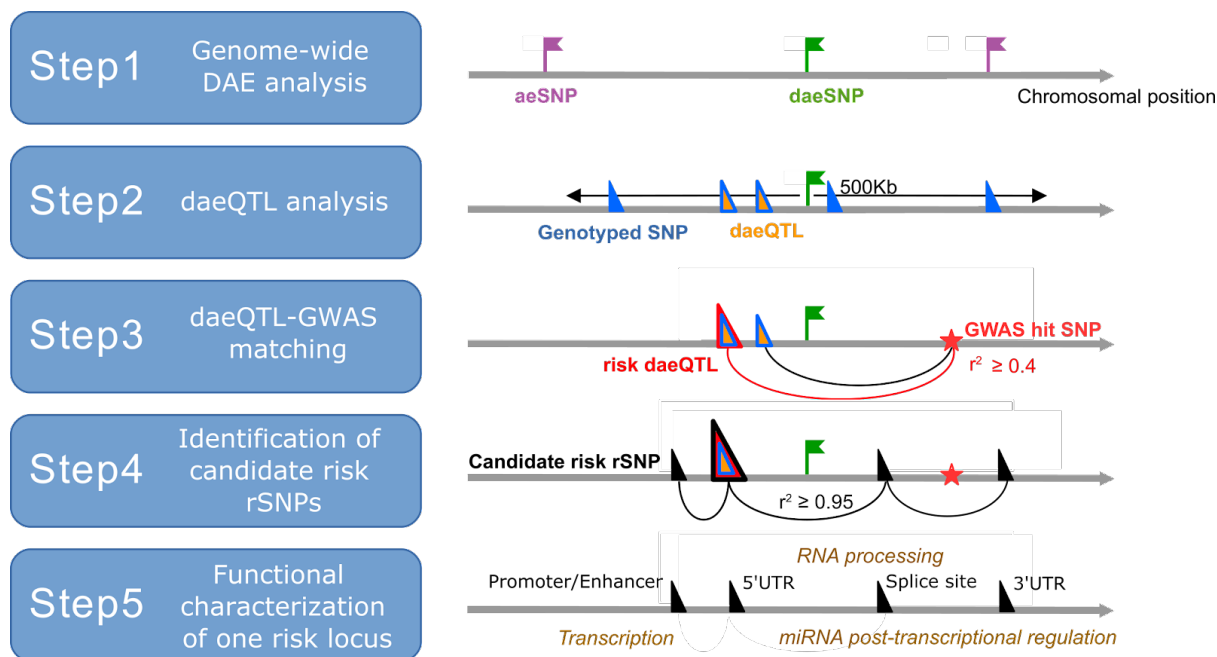

**Figure 1 - Strategy framework used to identify causal variants and target genes**

**associated with breast cancer risk.** Legend: *aeSNP* - an SNP that passed quality control and at which allelic expression (AE) was measured; *daeSNP* - an *aeSNP* showing differential AE (DAE); *Genotyped SNP* - an SNP with genotype information (either genotyped in the study or imputed) and tested for association with AE ratios; *daeQTL* - an SNP associated with AE ratios measured for a *daeSNP*; *risk-daeQTL* - a *daeQTL* with a  $r^2 \geq 0.4$  with a GWAS hit variant; *candidate risk rSNP* - a variant with a  $r^2 \geq 0.95$  with the *risk-daeQTL*.

10

## MATERIAL AND METHODS

### SNP and call filtering at the gDNA and cDNA levels

We used an Illumina Infinium Exon510S-Duo arrays dataset of normal breast tissue available from Gene Expression Omnibus (GEO, [www.ncbi.nlm.nih.gov/geo/](http://www.ncbi.nlm.nih.gov/geo/)) under  
5 accession number GSE35023 (Liu et al., 2012). It consists of 66 samples of DNA and cDNA (derived from total RNA) run on Illumina Infinium Exon510S-Duo arrays. These exon-centric microarrays contain probes for 511,354 SNPs, with more than 60% of the markers located within 10 kb of a gene and targeting more than 99.9% of human RefSeq genes. Sample filtering and normalization were performed as described previously, and 12 samples were  
10 removed from further analysis (Liu et al., 2012). We performed extensive quality control after microarray data normalization and before allelic expression analysis. First, a minimum cut-off of average  $\log_2$  RNA intensity values  $\geq 9.5$  for each probe was applied to remove non-expressed SNPs. Then, SNPs for which the RNA  $\log_2$  ratios could not discriminate between homozygous and heterozygous genotypes ( $t$  Test  $> 0.05$ ) were eliminated. Third, to  
15 guarantee high-quality genotyping data, a minimum call rate  $\geq 90\%$ , a Hardy-Weinberg equilibrium  $p$ -value  $> 1.0E-05$ , and at least five heterozygotes were requested for each SNP. Finally, we only kept SNPs uniquely mapped in the genome, not flagged as suspected in dbSNP149 GRCh38p7 and located in autosomes.

### Genome-wide DAE analysis

20 Allelic expression was measured in the filtered dataset of SNPs and samples in a varying number of individuals heterozygous (AB) for each transcribed SNP (aeSNP). As cDNA was prepared from total RNA, without selection for poly-A mRNAs, AE was measured for variants in fully processed and unspliced primary transcripts. Allelic expression ratios (AE ratios) were defined as the  $\log_2$  of the ratio between the levels of allele A transcript and the  
25 levels of allele B transcript (heterozygote ratio), normalized by the same heterozygote ratio calculated for genomic DNA (gDNA) (Figure S1), to account for copy number variation and correct for technical biases. Differential allelic expression (DAE) was called at the sample level when AE ratios were greater than 0.58 or less than -0.58 (corresponding to the  $\log_2$  of a 1.5-fold difference between alleles).

30 aeSNPs were classified as monoallelically expressed SNPs (maeSNPs) (Gimelbrant et al., 2007) when presenting more extreme AE ratios and a random distribution of heterozygotes above 0.58 and below -0.58 ratios, suggesting the expression of only one allele with a random choice between alleles. Genes with at least one maeSNP were labeled maeGenes.

After filtering out maeSNPs, the remaining aeSNPs were tested with the Equal or Given Proportions test (prop.test function in R), with the alternative hypothesis that the proportion of heterozygotes with absolute AE ratios  $\geq 0.58$  is greater than 10% for any given SNP. The resulting p-values were corrected using a false discovery rate of 5% to define  
5 daeSNPs (Figure S1, Figure 1 – Step 1). Genes with at least one daeSNP were henceforth denominated daeGenes.

Validation of nine daeSNPs was performed by TaqMan<sup>®</sup> PCR technology, as described previously (Maia et al., 2009), in 25 independent normal breast tissue samples heterozygous for a variable number of individuals per SNP using the following TaqMan<sup>®</sup>  
10 Genotyping Assays predesigned by Applied Biosystems: C\_\_8354687\_10; C\_\_29939330\_20; C\_\_31232634\_10; C\_\_3133316\_10; C\_\_11844169\_10; C\_\_2627792\_10; C\_\_1517694\_1\_; C\_\_787630\_20; C\_\_3108259\_10. The prop.test was equally applied to confirm the presence of differential allelic expression.

### Annotation of variants

15 Variants were annotated according to hg38/GRCh38 with biomaRt v 2.40.5. aeSNP consequence types were categorized as follows: UTR if classified as 3\_prime\_UTR\_variant or 5\_prime\_UTR\_variant; coding if classified as coding\_sequence\_variant, incomplete\_terminal\_codon\_variant, missense\_variant, stop\_retained\_variant, synonymous\_variant, stop\_lost, start\_lost, stop\_gained, splice\_region\_variant,  
20 splice\_acceptor\_variant or splice\_donor\_variant; intronic if classified as intron\_variant; and noncoding\_transcript\_variant if classified as noncoding\_transcript\_variant, noncoding\_transcript\_exon\_variant or mature\_miRNA\_variant. We classified aeSNPs further according to gene biotype as follows: pseudogene if located in IG\_C\_pseudogene, processed\_pseudogene, transcribed\_unprocessed\_pseudogene,  
25 transcribed\_unitary\_pseudogene, translated\_unprocessed\_pseudogene, unprocessed\_pseudogene, unitary\_pseudogene, transcribed\_processed\_pseudogene, polymorphic\_pseudogene or rRNA\_pseudogene; protein-coding gene if located in protein\_coding, IG\_V\_gene, TR\_C\_gene, TR\_J\_gene, TR\_V\_gene or TEC; and noncoding\_rna if located in lncRNA, miRNA, misc\_RNA, snRNA, snoRNA, scaRNA or  
30 ribozyme.

To test whether classes of consequence type and gene biotype were overrepresented (i.e., enriched) in the list of daeSNPs, we applied a one-tailed Fisher's exact test (alternative = "greater"). Information from imprinted genes was retrieved from a comprehensive study of genomic imprinting in the breast (Goovaerts et al., 2018) and from  
35 the geneimprint database (<http://www.geneimprint.com>) searching for Imprinted Genes: by Species: Human.

## Genotype imputation

Imputation was run on the Illumina Exon 510 Duo germline genotype data from the 64 samples that passed microarray quality control filters. Before imputation data, quality control was applied to the genotyping data, and SNPs with call rates < 85%, minor allele frequency < 0.01, and Hardy-Weinberg equilibrium with p-value < 1.0E-05 were excluded from the analysis. Imputation was performed using MACH1.0 (Li et al., 2010) and the phased haplotypes for HapMap3 release (HapMap3 NCBI Build 36, CEU panel - Utah residents with Northern and Western European ancestry) as a reference panel. We applied the recommended two-step imputation process: model parameters (crossover and error rates) were estimated before imputation using all haplotypes from the study subjects and running 100 iterations of the Hidden Markov Model (HMM) with the command option -greedy and -r 100. Genotype imputation was then carried out using the model parameter estimates from the previous round with command options of -greedy, -mle, and -mldetails specified. Imputation results were assessed by the platform-specific measures of imputation uncertainty for each SNP (rq Score) and filtered for an rq-score $\geq$ 0.3, as suggested in the author webpage (<http://csg.sph.umich.edu/abecasis/mach/tour/>) and MAF  $\geq$  0.01.

## Candidate rSNP mapping

Mapping of candidate rSNPs associated with the DAE observed - henceforth designated as daeQTLs (differential allelic expression quantitative trait loci) (Figure S1, Figure 1 - Step 2) - took into consideration the pattern of AE ratio distribution displayed by each daeSNP, as this is highly dependent on the LD between the daeSNP and the rSNP acting upon the gene (Xiao and Scott, 2011).

To test the association between candidate SNP zygosity and the allelic expression of a daeSNP, henceforth designated daeQTL analysis (differential allelic expression quantitative trait loci analysis), we considered the pattern of the allelic expression (AE) ratio distribution displayed at each daeSNP, as this is dependent on the linkage disequilibrium between the daeSNP and the rSNP. When a single rSNP is in strong LD ( $r^2 \sim 1$ ) with the daeSNP, the normalized AE ratios for all heterozygotes will be unidirectional, with all samples preferentially expressing the same allele (i.e., all samples exhibiting either positive AE ratios or negative AE ratios). In this case, a one-sample Wilcoxon test was used to compare the mean normalized AE ratios for samples heterozygous for the candidate rSNP to 0. When the rSNP is not in  $r^2 \sim 1$  with the daeSNP, the distribution of the AE ratios will depend on the rSNP-daeSNP haplotypes present in the analyzed samples, and we applied a two-sample Wilcoxon test for the null hypothesis that the absolute AE ratios at the samples heterozygous for the candidate rSNP are higher than the absolute AE ratios at the samples



homozygous for the tested rSNP. These tests were performed for rSNP-daeSNP pairs located within 500 kb of each other. P-values were adjusted with the Benjamini–Hochberg method (Hochberg and Benjamini, 1990), using all daeSNP/tested SNP pairs, with the distance between them as a covariate (package `ihw`, R) (Ignatiadis et al., 2016) and reported  
5 as significant when the false discovery rate was below 5%.

### **Breast cancer GWAS data retrieval**

Nine hundred and sixty-eight GWAS-significant risk-associated SNPs for BC published until April 2018 were retrieved from the NHGRI-EBI Catalog of published genome-wide association studies (GWAS Catalog) (MacArthur et al., 2017) using the `gwasrapidd` R  
10 package (Magno and Maia, 2019). Filters included a significance level cut-off p-value  $\leq 1.0E-05$  and the reported traits: “Breast cancer”, “Breast cancer (early onset)”, “Breast cancer (estrogen-receptor negative)”, “Breast cancer (male)”, “Breast cancer in BRCA1 mutation carriers”, “Breast cancer in BRCA2 mutation carriers”, “Breast cancer male”, and “Breast cancer and/or colorectal cancer”. The complete list of SNPs is presented in Table S1.

### **15 Proxy SNP retrieval**

Variants in LD with index SNPs were retrieved from Ensembl (Yates et al., 2015) using the function `get_ld_variants_by_window()` from the `ensemblR` R package (<https://github.com/ramiromagno/ensemblR>) using the 1000 GENOMES project data (phase\_3) for the CEU population and a genomic window size of 500 kb (250 kb upstream  
20 and downstream of the queried variant). The  $r^2$  cut-off used varied between 0.2 and 0.95 depending on the analysis and is indicated in each analysis description.

### **Retrieval of previously suggested BC target genes**

Genes previously suggested as targets of cis-acting regulatory variation in post-GWAS studies for BC, with extensive fine-scale mapping and *in silico* prediction or functional  
25 analysis, and those classified as *Inquisit 1* by Fachal and colleagues (Fachal et al., 2020) are indicated in Table S2.

### **GTEx eQTL and gene expression data retrieval**

The Genotype-Tissue Expression (GTEx) project identified expression quantitative  
30 trait loci (eQTL) using normal mammary tissue samples (Consortium et al., 2015). eGenes (genes with at least one SNP in cis significantly associated, at a false discovery rate (FDR) of  $\leq 0.05$ , with expression differences of that gene) and significant variant-gene associations



based on permutations were downloaded from GTEx Analysis V8 (dbGaP Accession phs000424.v8.p2, available on 18/07/2019).

All SNP-gene associations tested for breast mammary tissue, including nonsignificant and gene expression levels (TPM), were downloaded from GTEx Analysis V7  
5 (available on 2016-01-15).

### **Comparison of daeGenes, eGenes and gwasGenes**

First, the list of publicly available eGenes was compared with the daeGenes identified in our study, restricting this comparison to genes analyzed in both datasets. Then, we investigated the percentage of gwasGenes, defined as genes containing variants in  
10 moderate to strong LD ( $r^2 \geq 0.4$ ) with GWAS index SNPs, displaying evidence of cis-regulation by either DAE or eQTL analysis.

### **Functional characterization of candidate risk SNPs**

Candidate risk rSNPs were examined for regulatory potential by assessing the overlap of the variant's location with epigenetic marks derived from the ENCODE (Dunham  
15 et al., 2012) and NIH Roadmap Epigenomics project data (Kundaje et al., 2015) using the R package haploR. Candidate causal variants (variants overlapping with DNase I hypersensitivity sites and H3K4me1 or H3K4me3 or histone modifications in normal breast or breast tumor cell lines) at the 5q14.1-14.2 locus were further analyzed regarding their genomic context and transcription factor (TF) binding using the UCSC Genome Browser  
20 (Gonzalez et al., 2021; Kent et al., 2002), HaploReg v4.1 (Ward and Kellis, 2012) and RegulomeDB v1.1 (Boyle et al., 2012) tools. Emphasis was given to overlapping with transcription factor (TF) binding identified in breast myoepithelial cells (BR. MYO, E027), human mammary epithelial cells (HMECs, E119), variant human mammary epithelial cells (vHMECs, E028) and two BC cell lines (MCF-7 and T47D). Allele-specific epigenetic  
25 modifications (H3k4me3 and DNase I), RNA polymerase II (POL2), and transcription factors (TF) binding with alignment data available in HMEC, MCF-7 and MCF-10A breast cancer cell lines from ENCODE were retrieved and visualized with the Integrative Genomics Viewer (IGV Version 2.3.71) tool (Thorvaldsdóttir et al., 2013), to analyze protein–DNA interactions and allelic preferential binding. Differential allelic binding was analyzed in heterozygous  
30 candidate risk rSNPs located within TF binding peaks in experiments with a read coverage at the SNP site  $\geq 20$ . We applied a two-tailed binomial test with the null hypothesis assuming no bias (balanced binding of the protein to the two alleles of the variant). The p-value was corrected for multiple testing using the R package qvalue (Storey et al., 2021). When multiple tracks for the same SNP, trait, and cell line existed, only the p-value for the  
35 experiment with higher total read counts was reported in the main manuscript.

Analysis related to alternative transcription at the 5q14.1-14.2 locus was carried out in three ways. First, sQTLseekeR (v1.4) (Monlong et al., 2014) was used to test the association of genetic variants with alternative isoform expression in both normal breast and tumor tissue using total read counts derived from RNA-seq data from the TCGA (TCGA-  
5 BRCA, hg19) and GTEx (phs000424.v6.p1, hg38) projects. Only *ATG10* displayed sufficient alternative transcription dispersion to allow sQTL analysis. Additionally, all SNPs within 5 kb upstream or downstream of *ATG10* were included in the analysis, not only the candidate risk rSNPs, to increase the stringency of the association exercise. P-values for all SNPs tested for *ATG10* sQTL analysis were controlled for multiple testing using a 5% FDR. Correlation  
10 analyses between  $-\log_{10}$  (FDR q-value) and LD ( $r^2$ ) with rs7707921 were performed using Pearson's test. Then, the overlapping of variant location with RNA processing-associated proteins was assessed using CLIP data retrieved from POSTAR2 (<http://lulab.life.tsinghua.edu.cn/postar/>) (Zhu et al., 2019) and from RBP-Var (<http://www.rbp-var.biols.ac.cn/>) (Mao et al., 2016), which additionally informed on riboSNitch  
15 potential (Corley et al., 2015). Finally, allele-specific RBP binding predictions were performed with RBPmap (Paz et al., 2014) using the analyzed variant flanking sequence (30 nucleotides on each side, with the variant at index 31) using all available human RBP motifs.

### Haplotype analysis

Haplotypes in the 5q14.1-14.2 region were analyzed on Haploview 4.2 using the  
20 imputed genotypes from the 64 normal breast tissue samples (Barrett et al., 2005). For candidate risk SNPs whose genotype was not possible to determine (because it was neither genotyped nor imputed), a proxy SNP in strong LD ( $r^2 \geq 0.95$ ) was used instead. Haplotype blocks were generated using the default algorithm.

### TCGA-BRCA gene expression analysis

25 Processed gene expression and isoform expression from RNA-Seq data for 113 normal solid tissues and 1102 primary solid tumors from the TCGA-BRCA project, together with corresponding clinical data, were retrieved from the Genomic Data Commons archive using the R package TCGAbiolinks (Colaprico et al., 2016) accessed in October 2018. Isoform expression was annotated according to the genome assembly hg19, and total gene  
30 expression was annotated according to hg38. We applied two-sample Wilcoxon tests to compare the mean expression of *ATG10* isoforms between normal-solid tissues (normal-matched) and breast tumors, correcting for multiple testing with the Benjamini and Hochberg (BH) procedure. We applied Pearson's test to correlate gene expression among *ATG10*, *RPS23*, and *ATP6AP1L*. Spearman's test was applied to correlate *ATG10*, *RPS23*, and  
35 *ATP6AP1L* with *MYC* and *MAX* gene expression.

## RESULTS

### Cis-regulatory variation is common in normal breast tissue

Genome-wide allelic expression (AE) analysis was performed using microarray data from 64 normal breast tissue samples. Normalized allelic expression ratios were calculated for SNPs in coding and noncoding regions upon filtering for the cDNA signals' expression level and allelic discrimination potential. Overall, we identified 91,467 autosomal allelic-expressed SNPs (aeSNPs) located in 21,527 annotated Ensembl genes (median of three aeSNPs per gene) (Figure S2). Unsurprisingly, the number of aeSNPs analyzed per gene correlated with the annotated gene length ( $\rho = 0.60$ ,  $p$ -value  $< 2.2e-16$ , Figure S3).

We found that almost one-third of the aeSNPs (26,266 out of 91,467) displayed biallelic differential expression (daeSNPs,  $q$ -value  $\leq 0.05$ ) (Table 1, Table S3), while 84 SNPs displayed monoallelic expression (maeSNPs). TaqMan PCR validated seven out of nine daeSNPs (Figure S4) that showed significant DAE and concordant preferential expression (Fisher's exact test  $p$ -value  $> 0.05$ ).

Table 1. Summary of the genome-wide breast tissue allelic expression analysis results

| Set of SNPs | n      | Ensembl Gene IDs |
|-------------|--------|------------------|
| All aeSNPs  | 91467  | 21527            |
| maeSNPs     | 85     | 44               |
| daeSNPs     | 26,266 | 13,689           |

The daeSNPs are distributed across the genome, with low interchromosomal variability (ranging from 26 to 35%, Figure S5). They overlapped 13,688 (65%) annotated genes (daeGenes), of which 3,666 (17%) harbored three or more daeSNPs (Figure 2a, Table 1, Table S3). When considering daeSNPs mapping exclusively to one gene, we identified 8,193 daeGenes (out of 12,944) that showed evidence of being under the control of allele-specific cis-acting factors, either genetic or epigenetic. In terms of consistency of DAE detection across the length of these genes, we found that in the majority of daeGenes, the frequency of daeSNPs was higher than 40% (7476 in 13,688), with 3894 daeGenes presenting imbalances in all the analyzed aeSNPs (Figure 2b). The aeSNPs showed a large distribution of mean |AE ratios|, with daeSNPs centered at 0.60 (corresponding to a difference between alleles of 1.5) and non-daeSNPs centered at 0.26 (corresponding to a difference of 1.2). Twelve percent of daeSNPs showed average absolute AE ratios between 1 and 5, corresponding to average allelic fold changes ranging from 2 to 34 (Figure 2c, Table

S3). The amplitude of the imbalances measured at aeSNPs correlated negatively with the average expression level of both alleles ( $\rho = -0.4$ ,  $p$ -value  $< 2.2e-16$ ) (Figure 2d) but not with the standard deviation across individuals (Figure S6). The aeSNPs are located mainly in intronic regions and noncoding transcript genes, but non-daeSNPs and daeSNPs showed differences in class distribution for consequence type, with daeSNPs enriched at unannotated regions ( $p$ -value  $< 0.01$ , Figure 2e). Although most of the aeSNPs analyzed were in protein-coding genes, daeSNPs were relatively more common in noncoding genes and pseudogenes when compared to non-daeSNPs ( $p$ -value  $< 0.01$ , Figure 2f).

## 10 **Monoallelic expression in breast tissue**

Regarding monoallelic expression, maeSNPs were annotated to 44 Ensembl genes (Table 1, Table S4, Figure S7), the majority of which were previously reported as imprinted in breast tissue (e.g., *IGF2* or *ZDBF2*) or in other tissues (e.g., *KCNQ1*, *KCNQ1OT1*, *RTL1*, *NAA60*, *ZIM2*, and *L3MBTL1*), validating our AE analysis. Interestingly, we detected maeSNPs in a region containing the lncRNA *MEG9* and a cluster of miRNA genes that had only previously been reported as imprinted in nonhuman species (Hagan et al., 2009; Seitz et al., 2003; Tierling et al., 2006). Additionally, we found unreported monoallelic expression at an intergenic region (22q11.23), suggesting the existence of unannotated transcripts in this region. Notably, we observed two groups of heterozygotes preferentially expressing opposite alleles of rs17122278, an intronic variant of *ARCN1*, suggesting the latter as a candidate novel monoallelically expressed protein-coding gene in breast tissue.

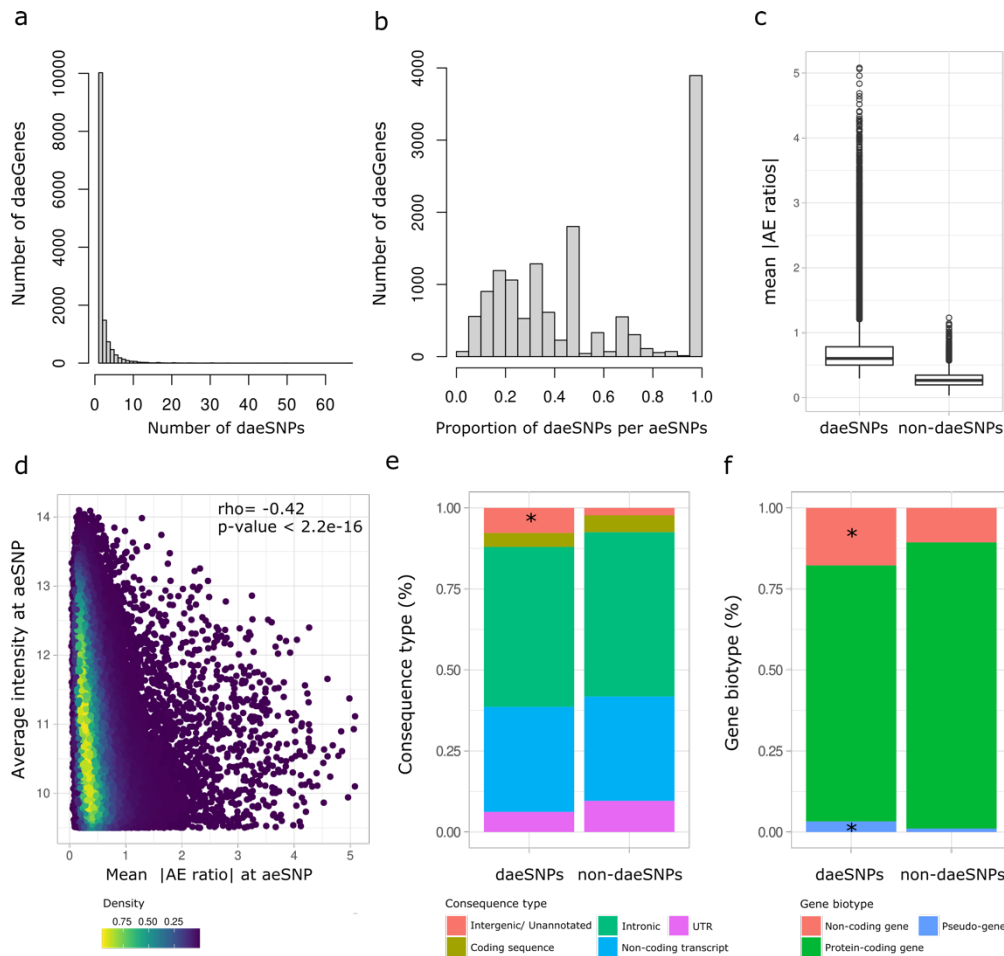

**Figure 2 - Characterization of aeSNPs.** a) Histogram of the rank number of daeSNPs identified per gene across 17135 annotated genes. b) Histogram of the rank proportion of daeSNPs per aeSNPs identified per gene. c) Box plot with the distribution of the mean of the absolute values of AE ratios across heterozygous individuals measured at non-daeSNPs and daeSNPs. d) Distribution of the mean absolute values of AE ratios at aeSNPs according to the average intensity of both alleles at aeSNPs in the microarray Spearman's results of a Spearman's correlation test are shown. e) and f) Relative frequency of aeSNPs and daeSNPs according to consequence type and gene biotype, respectively. (\*) denotes the classes for which daeSNPs were enriched ( $p < 0.01$ ).

## Mapping of daeQTLs in normal breast tissue

Evidence of DAE supports that a gene's expression is controlled by cis-regulatory variation, which can be mapped using AE ratios as a quantitative trait – in what we termed DAE quantitative trait loci (daeQTL) analysis. Here, we found a minority of daeSNPs (6928 out of 26266) for which all the heterozygotes preferentially expressed the same allele. This pattern indicates moderate to strong linkage disequilibrium between the daeSNP and the rSNPs acting on it (Xiao and Scott, 2011) [27]. Hence, our mapping approach considered the allelic expression (AE) ratio distribution pattern displayed at each daeSNP, and one-sample or two-sample Wilcoxon tests were applied accordingly. We identified 54357 daeQTLs (5% FDR) for 6761 (26%) daeGenes (Table S5), primarily located within 20 kb from the corresponding daeSNP but as far as the 500 kb window used for the analysis (Figure 3a). daeQTLs for *MROH8* and *ZNF132*, two coding genes located on chromosomes 19 and 20, respectively, were among the most significant ones found, but we identified other highly significant daeQTLs (adjusted p-values smaller than  $5.0E-04$ ) for 2507 genes.

15

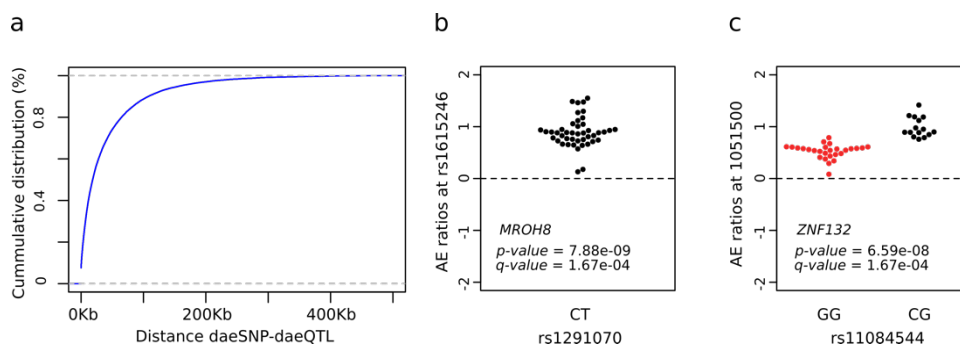

**Figure 3 - Mapping of variants associated with differential allelic expression. a)**

Empirical cumulative distribution for the distance between the daeSNP and corresponding mapped daeQTL. b) and c) daeQTL mapping result for the most significant daeQTL identified for *MROH8* using a one-sample Wilcoxon test and for *ZNF132* using a two-sample Wilcoxon test. The AE ratios calculated at the daeSNPs are represented on the y-axis in the two panels and stratified according to genotype at the candidate SNP (black dots represent heterozygous individuals, and red dots represent homozygous individuals).

25

## Identification of target genes within BC risk loci

To pinpoint the most likely candidate target genes within BC risk loci, a main post-GWAS challenge, we identified the genes within previously reported GWAS loci (gwasGenes) displaying the most robust evidence of being under the control of cis-regulatory variation, provided either by DAE (daeGenes) or eQTL (eGenes) analysis. We

30



found that most gwasGenes (783 out of 948) showed such evidence, with 69% of these with evidence via DAE analysis (358 genes identified solely by DAE and 300 by both analyses) (Table S6). Compared to all genes studied, gwasGenes presented a significant enrichment of Fisher's significance of DAE (Fisher's exact test =  $2.48e-05$ ). Finally, we successfully mapped daeQTLs for 385 gwasGenes (Figure 4, Table S6).

Next, we verified our ability to identify 178 previously proposed breast cancer target genes (Table S2). We found that 44% of these genes were exclusively daeGenes (e.g., *ELL*, *TOX3*, *RNF115*), 23% were both daeGenes and eGenes (e.g., *CASP8*, *POU5F1B*, *STXBP4*) and 14% were exclusively eGenes (e.g., *RMND1*, *HELQ*, *PRKRIP1*). However, we did not find evidence supporting other genes, such as *CITED4*, *IGFBP5*, and *MYC*. (Table S2). As total levels of gene expression may confound the ability to identify daeGenes and eGenes, it is noteworthy that eGenes showed higher median levels overall than daeGenes and only 4.7% of exclusive daeGenes showed low median levels ( $<0.1$  TPM) (Figure S8).

## 15 Identification of causal variants within BC risk loci

Another post-GWAS challenge we addressed was the identification of the causal variants within risk loci. We first identified 1431 daeQTLs in moderate to strong LD ( $r^2 \geq 0.4$ ) with GWAS index SNPs (Figure 1 – Step 3) (GWAS p-value  $< 1.0E-05$ ), henceforth referred to as risk-daeQTLs. These were distributed across 93 loci in 19 chromosomes, primarily in introns, followed by intergenic regions (Table S7, Figure S9). Then, we assessed these risk-daeQTLs plus their proxies ( $r^2 \geq 0.95$ ) for their cis-acting regulatory potential. We started by identifying 425 variants located in DNase I hypersensitivity sites (DHS), of which the majority (69%) mapped to regions with histone marks associated with active regulatory elements (Figure 4b, Figure S10). More specifically, 149 risk-daeQTLs co-localized with both active promoter (H3K4me3 and H3K9ac) and active enhancer-associated (H3K4me1 and H3K27ac) histone marks, 76 co-localized exclusively with active enhancer-associated marks and another 67 exclusively co-localized with active promoter-associated marks. Of these, 122 risk-daeQTLs also showed protein binding evidence, thus representing strong candidate causal variants within 41 of the initial 93 BC risk loci (Table S8).

Among these 41 risk loci, we detected 47 novel candidate target genes in 29 loci with no previous report of target genes, such as *SMC2* in 9q31.1, *MLLT10* in 10p12.32, and *MAN2C1* and *PTPN9* in 15q24.2. We confirmed previously reported target genes in nine loci and identified eight novel genes, including *NASP* and *IPP* in 1p34.1 and *ATP6AP1L* in 5q14.1. Finally, we identified strong candidate causal variants at six loci but could not discern the target gene due to a lack of genomic annotation (Table 2).



Notably, 2222 daeQTLs were also in lower LD with GWAS hits ( $0.2 \leq r^2 < 0.4$ ), representing a valuable dataset warranting further exploration (Table S9).

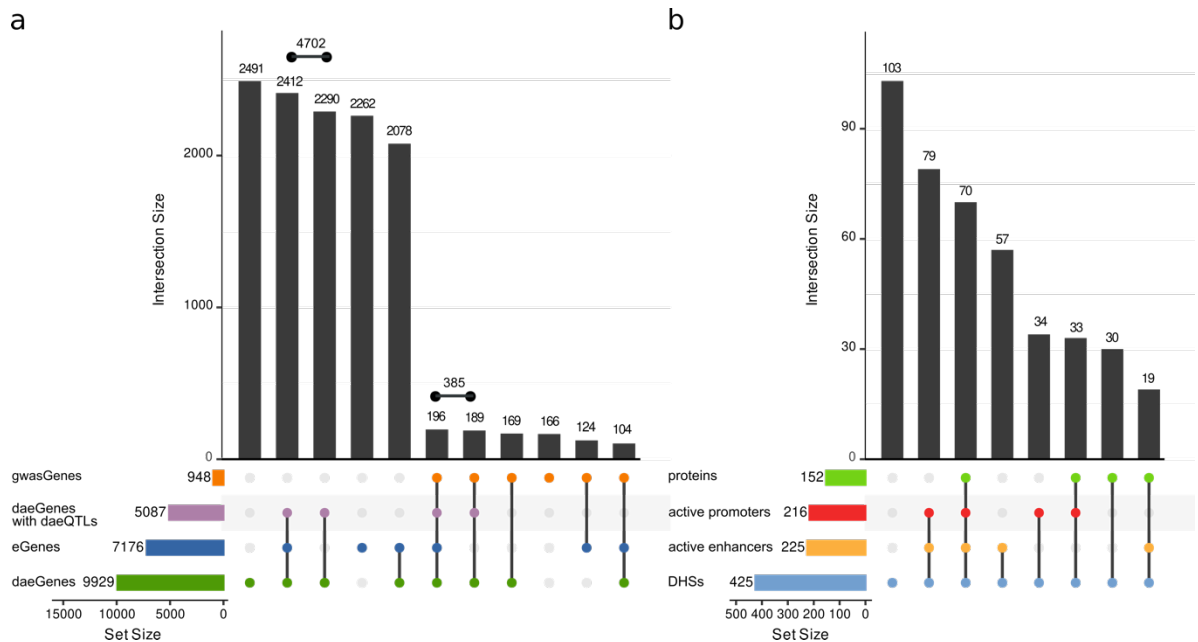

5

**Figure 4 – Summary of colocalization analyses for daeGenes and risk-daeQTLs. a)** UpSet plot for 15,706 genes tested for DAE and eQTL (GTEx breast mammary tissue). Legend: daeGenes - genes identified as having differential allelic expression in normal breast tissue; eGenes - genes reported as being eQTL genes in GTEx mammary tissue data ( $q\text{-value} \leq 0.05$ ); gwasGenes - genes where GWAS index SNPs or proxies ( $r^2 \geq 0.4$ ) are located; daeGenes with daeQTL mapping - daeGenes for which daeQTLs were identified. **b)** UpSet plot for 425 variants located in DHSs, according to the presence of protein binding and location in active promoters and/or enhancers in breast cell lines.

10

**Table 2.** Loci with candidate risk rSNPs and novel suggested target genes.

| Chr_band                                         | GWAS variant                                | GWAS nearest gene                      | Candidate causal variants | daeQTL gene                 | Regulatory Feature                  |
|--------------------------------------------------|---------------------------------------------|----------------------------------------|---------------------------|-----------------------------|-------------------------------------|
| <b>A. Loci with novel suggested target genes</b> |                                             |                                        |                           |                             |                                     |
| 1p36.23                                          | rs225132                                    | ERRFI1-DT                              | rs12757968                | ERRFI1-DT                   | Active enhancer                     |
| 1q22                                             | rs10796944, rs7524950                       | ASH1L, PKLR                            | rs1046188                 | FDPS, RUSC1-AS1             | Active promoter and active enhancer |
| 1q22                                             | rs348196, rs10796944, rs12091730, rs7524950 | DAP3, ASH1L, MSTO1, DAP3P1, PKLR       | rs2048431                 | FDPS, RUSC1-AS1             | Active promoter and active enhancer |
| 1q22                                             | rs348196                                    | DAP3                                   | rs3841838                 | ARHGEF2, RIT1               | Active promoter and active enhancer |
| 1p23.2                                           | rs67073037                                  | WDR43                                  | rs4407214                 | WDR43                       | Active promoter and active enhancer |
| 4p12                                             | rs199501877                                 | NIPAL1, TXK                            | rs98270                   | NIPAL1                      | Active promoter and active enhancer |
| 5q11.1                                           | rs145106188                                 | EMB                                    | rs4865698                 | EMB                         | Active enhancer                     |
| 5q11.1                                           | rs145106188                                 | EMB                                    | rs4865699                 | EMB                         | Active enhancer                     |
| 5q11.1                                           | rs145106188                                 | EMB                                    | rs28528780                | EMB                         | Active promoter and active enhancer |
| 5q31.1                                           | rs6860806                                   | SLC22A4                                | rs1979981                 | SLC22A4, MIR3936HG, SLC22A5 | Active promoter and active enhancer |
| 5q31.1                                           | rs6860806                                   | SLC22A4                                | rs162887                  | SLC22A4, MIR3936HG, SLC22A5 | Active promoter and active enhancer |
| 5q31.1                                           | rs6860806                                   | SLC22A4                                | rs460089                  | SLC22A4, MIR3936HG, SLC22A5 | Active promoter and active enhancer |
| 5q31.1                                           | rs6860806                                   | SLC22A4                                | rs460271                  | SLC22A4, MIR3936HG, SLC22A5 | Active promoter and active enhancer |
| 5q31.1                                           | rs6860806                                   | SLC22A4                                | rs367805                  | SLC22A4, MIR3936HG, SLC22A5 | Active enhancer                     |
| 5q31.1                                           | rs6860806                                   | SLC22A4                                | rs2631369                 | SLC22A4, MIR3936HG, SLC22A5 | Active promoter and active enhancer |
| 5q31.1                                           | rs6860806                                   | SLC22A4                                | rs2631368                 | SLC22A4, MIR3936HG, SLC22A5 | Active promoter and active enhancer |
| 5q31.1                                           | rs736801                                    | ENSG00000283782                        | rs2070721                 | ENSG00000283782             | Active promoter and active enhancer |
| 5q31.1                                           | rs736801                                    | ENSG00000283782                        | rs2548998                 | ENSG00000283782             | Active promoter and active enhancer |
| 6p22.2                                           | rs17598658, rs13195401                      | H2BC6, BTN2A1                          | rs9467701                 | BTN3A2                      | Active promoter and active enhancer |
| 6p22.2                                           | rs17598658, rs13195401                      | H2BC6, BTN2A1                          | rs6923139                 | BTN3A2                      | Active promoter and active enhancer |
| 6p22.2                                           | rs17598658, rs13195401                      | H2BC6, BTN2A1                          | rs6903015                 | BTN3A2                      | Active promoter and active enhancer |
| 6p22.2                                           | rs17598658, rs13195401                      | H2BC6, BTN2A1                          | rs68112369                | BTN3A2                      | Active promoter                     |
| 6p22.2                                           | rs17598658, rs13195401                      | H2BC6, BTN2A1                          | rs66827971                | BTN3A2                      | Active promoter                     |
| 6p22.2                                           | rs13195401                                  | BTN2A1                                 | rs9379873                 | BTN3A2                      | Active promoter and active enhancer |
| 6p22.2                                           | rs71557345, rs13195401                      | ENSG00000285571, BTN2A1                | rs36162392                | BTN3A2                      | Active promoter and active enhancer |
| 6p22.1                                           | rs3094146, rs1611579                        | ZNRD1ASP, ENSG00000285799              | rs707910                  | HLA-A                       | Active promoter and active enhancer |
| 6p22.1                                           | rs3094146, rs1611579                        | ZNRD1ASP, ENSG00000285799              | rs415137                  | HLA-A                       | Active promoter and active enhancer |
| 6p22.1                                           | rs3094146, rs1611579                        | ZNRD1ASP, ENSG00000285799              | rs438610                  | HLA-A                       | Active promoter and active enhancer |
| 6p22.1                                           | rs3094054, rs3094146, rs3132615             | UBQLN1P1, ZNRD1ASP, ENSG00000288805    | rs2188100                 | HCG17, HLA-L                | Active promoter and active enhancer |
| 6p22.1                                           | rs3129984, rs3132610, rs9262142, rs3132615  | ENSG00000288805, HCG20, ABCF1, PPP1R18 | rs9262142                 | C6orf136                    | Active promoter and active enhancer |

|          |                                                          |                         |            |                                 |                                     |
|----------|----------------------------------------------------------|-------------------------|------------|---------------------------------|-------------------------------------|
| 7q21.3   | rs847577                                                 | LMTK2                   | rs1874343  | TECPR1                          | Active promoter and active enhancer |
| 9q31.1   | rs4742903, rs718857                                      | SMC2                    | rs3818625  | SMC2                            | Active promoter                     |
| 9q31.1   | rs4742903, rs718857                                      | SMC2                    | rs3818626  | SMC2                            | Active promoter                     |
| 9q31.1   | rs4742903, rs718857                                      | SMC2                    | rs10820599 | SMC2                            | Active promoter                     |
| 9q31.1   | rs4742903, rs718857                                      | SMC2                    | rs10820600 | SMC2                            | Active promoter                     |
| 9q31.1   | rs4742903, rs718857                                      | SMC2                    | rs4742903  | SMC2                            | Active promoter                     |
| 10p12.31 | rs7072776, rs10828247, rs11012730, rs10828249, rs7098100 | MLLT10, SKIDA1          | rs10828247 | MLLT10                          | Active promoter                     |
| 10p12.1  | rs7918232                                                | ANKRD26                 | rs7907988  | YME1L1                          | Active promoter and active enhancer |
| 10q21.2  | rs10822013                                               | ENSG00000285837, ZNF365 | rs10822013 | ENSG00000285837                 | Active enhancer                     |
| 11p11.2  | rs11039183                                               | MADD                    | rs7947450  | SPI1                            | Active promoter                     |
| 11q13.1  | rs617791                                                 | DRAP1, TSGA10IP         | rs14157    | SART1                           | Active promoter                     |
| 11q13.1  | rs617791                                                 | DRAP1, TSGA10IP         | rs12794370 | SART1                           | Active promoter and active enhancer |
| 11q13.2  | rs1783730                                                | TMEM151A                | rs33981819 | ENSG00000254458                 | Active promoter and active enhancer |
| 11q13.2  | rs11344495, rs55908905                                   | CTSF, SPTBN2            | rs11110    | DPP3-DT, B4GAT1-DT              | Active promoter and active enhancer |
| 11q13.2  | rs11344495, rs55908905                                   | CTSF, SPTBN2            | rs55853079 | DPP3-DT, B4GAT1-DT              | Active promoter and active enhancer |
| 11q22.3  | rs11374964                                               | POGLUT3                 | rs228589   | NPAT                            | Active promoter                     |
| 11q22.3  | rs11374964                                               | POGLUT3                 | rs189037   | NPAT                            | Active promoter                     |
| 11q23.1  | rs505372                                                 | SIK2                    | rs541198   | NA                              | Active promoter and active enhancer |
| 11q23.1  | rs505372                                                 | SIK2                    | rs7107213  | CRYAB                           | Active promoter and active enhancer |
| 14q13.2  | rs58327846                                               | PRORP                   | rs1056879  | PRORP                           | Active promoter and active enhancer |
| 14q13.2  | rs58327846                                               | PRORP                   | rs2236167  | PRORP                           | Active promoter and active enhancer |
| 14q32.33 | rs60226654                                               | COA8                    | rs3759586  | KLC1, XRCC3                     | Active enhancer                     |
| 15q21.1  | rs1876206                                                | FBN1                    | rs8029993  | FBN1                            | Active enhancer                     |
| 15q24.2  | rs60381548, rs8027365                                    | SIN3A, PTPN9            | rs11637068 | MAN2C1, PTPN9                   | Active promoter and active enhancer |
| 15q24.2  | rs60381548, rs8027365                                    | SIN3A, PTPN9            | rs75219778 | MAN2C1, PTPN9                   | Active promoter                     |
| 15q24.2  | rs60381548, rs8027365                                    | SIN3A, PTPN9            | rs62027209 | MAN2C1, PTPN9                   | Active promoter and active enhancer |
| 15q26.1  | rs77554484                                               | PRC1, ENSG00000284946   | rs867468   | PRC1, PRC1-AS1, ENSG00000284946 | Active promoter and active enhancer |
| 15q26.1  | rs77554484                                               | PRC1, ENSG00000284946   | rs2001216  | PRC1, PRC1-AS1, ENSG00000284946 | Active promoter and active enhancer |
| 15q26.1  | rs77554484                                               | PRC1, ENSG00000284946   | rs12905855 | PRC1, PRC1-AS1, ENSG00000284946 | Active promoter and active enhancer |
| 16q12.2  | rs17817449, rs62033406, rs7193144, rs62048402            | FTO                     | rs9940128  | FTO                             | Active enhancer                     |
| 16q12.2  | rs17817449, rs62033406, rs7193144, rs62048402            | FTO                     | rs11642015 | FTO                             | Active enhancer                     |
| 16q12.2  | rs17817449, rs62033406, rs7193144, rs62048402            | FTO                     | rs17817497 | FTO                             | Active enhancer                     |
| 16q12.2  | rs17817449, rs62033406, rs7193144, rs62048402            | FTO                     | rs8050136  | FTO                             | Active enhancer                     |
| 16q13    | rs2303282, rs2432539                                     | BBS2, AMFR              | rs2440467  | AMFR                            | Active enhancer                     |

|                                                       |                       |                 |             |                                                                   |                                     |
|-------------------------------------------------------|-----------------------|-----------------|-------------|-------------------------------------------------------------------|-------------------------------------|
| 17q21.31                                              | rs2732699             | ARL17B          | rs76594404  | CRHR1, KANSL1, LINC02210, LINC02210-CRHR1, MAPT, MAPT-AS1, ARL17B | Active promoter and active enhancer |
| 17q21.31                                              | rs2732699             | ARL17B          | rs80233201  | CRHR1, KANSL1, LINC02210, LINC02210-CRHR1, MAPT, MAPT-AS1, ARL17B | Active promoter and active enhancer |
| 17q21.31                                              | rs2732699             | ARL17B          | rs62056778  | CRHR1, KANSL1, LINC02210, LINC02210-CRHR1, MAPT, MAPT-AS1, ARL17B | Active promoter and active enhancer |
| 17q21.31                                              | rs2732699             | ARL17B          | rs11575895  | CRHR1, KANSL1, LINC02210, LINC02210-CRHR1, MAPT, MAPT-AS1, ARL17B | Active promoter                     |
| 17q21.31                                              | rs2732699             | ARL17B          | rs62056779  | CRHR1, KANSL1, LINC02210, LINC02210-CRHR1, MAPT, MAPT-AS1, ARL17B | Active promoter                     |
| 17q21.31                                              | rs2732699             | ARL17B          | rs74548327  | CRHR1, KANSL1, LINC02210, LINC02210-CRHR1, MAPT, MAPT-AS1, ARL17B | Active promoter                     |
| 17q21.31                                              | rs2732699             | ARL17B          | rs111972148 | CRHR1, KANSL1, LINC02210, LINC02210-CRHR1, MAPT, MAPT-AS1, ARL17B | Active promoter                     |
| 17q21.31                                              | rs2732699             | ARL17B          | rs242561    | CRHR1, KANSL1, LINC02210, LINC02210-CRHR1, MAPT, MAPT-AS1, ARL17B | Active promoter                     |
| 17q21.31                                              | rs2732699             | ARL17B          | rs2316951   | CRHR1, KANSL1, LINC02210, LINC02210-CRHR1, MAPT, MAPT-AS1, ARL17B | Active enhancer                     |
| 17q21.31                                              | rs2732699             | ARL17B          | rs11079733  | CRHR1, KANSL1, LINC02210, LINC02210-CRHR1, MAPT, MAPT-AS1, ARL17B | Active promoter                     |
| 17q21.31                                              | rs2732699             | ARL17B          | rs2696633   | CRHR1, KANSL1, LINC02210, LINC02210-CRHR1, MAPT, MAPT-AS1, ARL17B | Active promoter                     |
| 17q21.31                                              | rs2732699             | ARL17B          | rs143625699 | ARL17B, KANSL1                                                    | Active promoter                     |
| 17q21.31                                              | rs2732699             | ARL17B          | rs113417378 | CRHR1, KANSL1, LINC02210, LINC02210-CRHR1, MAPT, MAPT-AS1, ARL17B | Active promoter                     |
| 17q21.31                                              | rs2732699             | ARL17B          | rs143191191 | CRHR1, KANSL1, LINC02210, LINC02210-CRHR1, MAPT, MAPT-AS1, ARL17B | Active enhancer                     |
| 22q13.31                                              | rs28512361            | ENSG00000235091 | rs134847    | ATXN10                                                            | Active promoter                     |
| 22q13.31                                              | rs28512361            | ENSG00000235091 | rs2071872   | ATXN10                                                            | Active promoter and active enhancer |
| <b>B. Loci with previously suggested target genes</b> |                       |                 |             |                                                                   |                                     |
| 1p34.1                                                | rs12077974            | MAST2           | rs6697821   | NASP#, IPP#                                                       | Active promoter and active enhancer |
| 1p34.1                                                | rs12077974, rs1707302 | MAST2, PIK3R3   | rs1707303   | NASP#, IPP#, PIK3R3                                               | Active promoter and active enhancer |
| 1p34.1                                                | rs12077974            | MAST2           | rs1707302   | NASP#, IPP#, PIK3R3                                               | Active enhancer                     |

|          |                                                           |                                  |             |                                   |                                     |
|----------|-----------------------------------------------------------|----------------------------------|-------------|-----------------------------------|-------------------------------------|
| 2q33.1   | rs10931936, rs1035142, rs1830298, rs700635, rs3769821     | CASP8                            | rs3769823   | CASP8                             | Active promoter and active enhancer |
| 3q12.1   | rs9837602, rs9833888, rs9289981                           | CMSS1, FILIP1L                   | rs793463    | CMSS1#, FILIP1L                   | Active enhancer                     |
| 3q12.1   | rs9837602, rs9833888                                      | CMSS1, FILIP1L                   | rs28714363  | CMSS1#, FILIP1L                   | Active enhancer                     |
| 5q14.1   | rs7707921, rs111549985, rs2407064, rs146817970, rs2407156 | ATG10, ATP6AP1L                  | rs111549985 | ATG10, ATP6AP1L                   | Active promoter and active enhancer |
| 5q14.1   | rs7707921, rs2407064, rs146817970, rs2407156              | ATG10                            | rs226198    | ATG10, ATP6AP1L                   | Active promoter and active enhancer |
| 5q14.1   | rs7707921, rs2407064, rs146817970, rs2407156              | ATG10                            | rs6880209   | ATG10, ATP6AP1L                   | Active promoter and active enhancer |
| 5q14.1   | rs7707921, rs2407064, rs146817970, rs2407156              | ATG10                            | rs11325430  | ATG10, ATP6AP1L                   | Active promoter and active enhancer |
| 5q14.1   | rs7707921, rs2407064, rs146817970                         | ATG10                            | rs17247678  | ATG10, ATP6AP1L                   | Active enhancer                     |
| 7q21.2   | rs6964587, rs10644111, rs35417517                         | AKAP9, LRRD1, CYP51A1-AS1        | rs1011372   | AKAP9                             | Active promoter and active enhancer |
| 7q21.2   | rs35522438, rs35417517, rs10644111, rs6964587             | AKAP9, LRRD1, CYP51A1-AS1, KRIT1 | rs5885795   | AKAP9                             | Active promoter and active enhancer |
| 7q21.2   | rs35522438, rs35417517, rs10644111, rs6964587             | AKAP9, LRRD1, CYP51A1-AS1, KRIT1 | rs4727266   | AKAP9                             | Active promoter and active enhancer |
| 7q21.2   | rs35522438, rs35417517, rs10644111, rs6964587             | AKAP9, LRRD1, CYP51A1-AS1, KRIT1 | rs4727267   | AKAP9                             | Active promoter and active enhancer |
| 7q21.2   | rs35522438, rs35417517, rs10644111, rs6964587             | AKAP9, LRRD1, CYP51A1-AS1, KRIT1 | rs6465339   | AKAP9                             | Active promoter and active enhancer |
| 7q21.2   | rs35522438, rs35417517, rs10644111, rs6964587             | AKAP9, LRRD1, CYP51A1-AS1, KRIT1 | rs4279      | AKAP9                             | Active promoter and active enhancer |
| 7q21.2   | rs35522438, rs35417517, rs10644111, rs6964587             | AKAP9, LRRD1, CYP51A1-AS1, KRIT1 | rs12704637  | AKAP9                             | Active promoter and active enhancer |
| 11p15.5  | rs6597981                                                 | PIDD1                            | rs7942564   | GATD1                             | Active promoter and active enhancer |
| 11p15.5  | rs6597981                                                 | PIDD1                            | rs7948070   | GATD1                             | Active promoter and active enhancer |
| 11q13.1  | rs3903072                                                 | SNX32, OVOL1                     | rs4621      | CFL1, SNX32#                      | Active promoter and active enhancer |
| 11q13.1  | rs3903072                                                 | SNX32, OVOL1                     | rs7125986   | CFL1, SNX32#                      | Active promoter                     |
| 11q13.1  | rs3903072                                                 | SNX32, OVOL1                     | rs7947929   | CFL1, SNX32#                      | Active promoter                     |
| 11q13.1  | rs3903072                                                 | SNX32, OVOL1                     | rs7947741   | CFL1, SNX32#                      | Active promoter                     |
| 11q13.1  | rs3903072                                                 | SNX32, OVOL1                     | rs13817     | CFL1, SNX32#                      | Active promoter and active enhancer |
| 19p13.11 | rs8170                                                    | BABAM1                           | rs3745187   | ABHD8                             | Active promoter                     |
| 19p13.11 | rs2965183, rs2304098                                      | GATAD2A, YJEFN3                  | rs3934667   | MAU2                              | Active promoter                     |
| 19p13.11 | rs2965183, rs2304098                                      | GATAD2A, YJEFN3                  | rs2916068   | MAU2                              | Active promoter                     |
| 19p13.11 | rs2965183, rs2304098                                      | GATAD2A, YJEFN3                  | rs80007081  | YJEFN3#, CILP2#, ENSG00000258674# | Active promoter and active enhancer |
| 19p13.11 | rs2965183, rs2304098                                      | GATAD2A, YJEFN3                  | rs17684164  | YJEFN3#, CILP2#, ENSG00000258674# | Active promoter and active enhancer |
| 19p13.11 | rs2965183, rs2304098                                      | GATAD2A, YJEFN3                  | rs77254326  | YJEFN3#, CILP2#, ENSG00000258674# | Active promoter and active enhancer |

| <b>C. Loci for which no target gene could be pointed</b> |                                |            |             |                |                                     |
|----------------------------------------------------------|--------------------------------|------------|-------------|----------------|-------------------------------------|
| 6p22.1                                                   | rs9257408                      | KRT18P1    | rs209174    | NA             | Active promoter and active enhancer |
| 6p22.1                                                   | rs9257408                      | KRT18P1    | rs209173    | NA             | Active promoter and active enhancer |
| 6p22.1                                                   | rs9257408                      | KRT18P1    | rs3135315   | NA             | Active promoter and active enhancer |
| 6p22.1                                                   | rs9257408                      | KRT18P1    | rs184093    | NA             | Active promoter and active enhancer |
| 6p22.1                                                   | rs9257408                      | KRT18P1    | rs209138    | NA             | Active promoter                     |
| 6p22.1                                                   | rs9257408                      | KRT18P1    | rs3131102   | NA             | Active promoter                     |
| 17q23.1                                                  | rs61495451                     | VMP1       | rs3803863   | chr17:59852174 | Active promoter                     |
| 17q23.1                                                  | rs61495451                     | VMP1       | rs2333562   | chr17:59852174 | Active promoter and active enhancer |
| 17q23.1                                                  | rs61495451                     | VMP1       | rs138148328 | chr17:59852174 | Active enhancer                     |
| 19p13.11                                                 | rs4808801, rs172032, rs7258465 | ELL, SSBP4 | rs28375303  | chr19:18416447 | Active promoter                     |
| 19p13.11                                                 | rs4808801, rs172032, rs7258465 | ELL, SSBP4 | rs271621    | chr19:18416447 | Active promoter and active enhancer |

Legend: \* Reported as rs116095464 in the original GWAS

# Linkage disequilibrium (LD) values  $r^2$  between the daeQTL and the GWAS risk variant in the European population

5 § Gene not expressed in breast mammary tissue or without expression information in GTEx

## Mapping of cis-regulatory risk variants at the 5q14.1-14.2 locus

To further show the potential use of our integrated approach, we focused our follow-up studies on the BC risk locus 5q14.1-14.2, where some of the most significant risk-daeQTLs and candidate causal variants were identified. In this locus, rs7707921 was previously associated with BC risk in two meta-analyses (OR for alternative A allele = 1.07, 95% CI = [1.05-1.1],  $p=5E-11$ ) (Michailidou et al., 2017, 2015). The region containing this intronic variant of *ATG10*, its proxy variants ( $r^2 \geq 0.4$ ), and other risk-associated variants reported in this locus spans three genes (*ATG10*, *RPS23*, and *ATP6AP1L*), hindering the identification of the causal variant(s) and their target gene(s) in this locus.

First, all three genes showed DAE, supporting their regulation by cis-regulatory variants: 10 daeSNPs out of 37 aeSNPs at *ATG10*, one daeSNP out of two aeSNPs at *RPS23*, and three daeSNPs out of five aeSNPs at *ATP6AP1L* (Figure S11). The highest mean |AE ratios| detected at daeSNPs in these genes was 1.27 (2.4-fold) at *RPS23*, followed by 0.92 (1.9-fold) at *ATP6AP1L* (Figure 5 - panel 2, Figure S11). By daeQTL mapping analysis, we identified daeQTLs for all three genes: 56 for *ATG10* (spreading along the *ATG10-ATP6AP1L* region), 4 for *RPS23* (limited to *RPS23-ATP6AP1L*) and 26 for *ATP6AP1L* (spreading along the *ATG10-ATP6AP1L* region) (Figure 5 - panels 3 to 5). Additionally, we classified as risk-daeQTLs the 38 *ATG10* daeQTLs and 24 *ATP6AP1L* daeQTLs (22 of which are common to the two genes) in moderate to strong LD ( $r^2 \geq 0.4$ ) with the risk-associated variants. Furthermore, both *ATG10* and *ATP6AP1L* daeQTL analysis results strongly correlated with the corresponding LD with the GWAS lead-SNP rs7707921 (Figure S12), further supporting the role of variants regulating the expression of these two genes in the risk for breast cancer.



## Cis-regulatory risk variants act via two different mechanisms on genes in the 5q14.1-14.2 locus

The overlap analysis of the risk-daeQTLs with epigenetic marks in breast cell lines identified seven candidate causal variants for *ATG10* and *ATP6AP1L* (Table S8, Table S10).

5 We investigated these variants further for allelic differences in transcription factor binding and association with histone modifications and DHSs. One of these SNPs, rs111549985, overlies the active promoter of *ATG10* (Figure S13), and its minor G-allele is preferentially associated with the H3K4Me3 modification in HMECs (2.7-fold,  $p = 3.7e-03$ ) and shows robust preferential binding by POL2 in MCF7 cells (9-fold,  $p = 4.0E-04$ ). However, DHS was

10 more significantly associated with the major/reference C allele in T47D cells (0.5-fold,  $p = 4.6e-05$ ) (Figure 6a, Table S11). Another two candidate causal variants, rs226198 (intronic to *RPS23*) and rs688025'UTR (located at *RPS23* 5'UTR) overlay the shared promoter of *RPS23* and *ATP6AP1L* and a predicted enhancer interacting with the *ATG10* promoter (Figure S14). The minor C-allele of rs226198 showed preferential binding by MYC and MAX

15 transcription factors, which are known to cooperate in cancer (Dang, 2012) (12.6-fold and 7.9-fold difference, respectively,  $p < 2.2e-16$ ) and preferential H3K4me3 marking (2.7-fold,  $p = 1.4e-02$ ) in MCF-7 cells (Figure 6b, Table S11). It would be interesting to elucidate whether rs226198 impacts the binding of both factors and H3K4me3 deposition or whether this epigenetic mark is a consequence of altered transcription, as previously suggested

20 (Floc'hlay et al., 2020; Howe et al., 2017). The minor T-allele of rs6880209 also showed preferential binding by MYC (4.8-fold,  $p < 2.2e-16$ ) and MAX (2.4-fold,  $p = 2.7e-03$ ), with smaller fold-change differences than rs226198, and additional preferential binding by POL2 (2.6-fold,  $p = 1.27e-06$ ) in MCF7 cells. However, similar to rs111549985, DHS preferentially occurred in the major/reference C-allele in T47D cells (5.3-fold,  $p = 9.1e-04$ ) (Figure 6c,

25 Table S11). Interestingly, the expression of *MAX* correlated with *ATG10*, *RPS23*, and *ATP6AP1L*, and the expression of *MYC* correlated with the expression of *ATG10* (Figure S15). Furthermore, the expression levels of *ATG10* and *ATP6AP1L* were positively correlated in breast tissue from healthy women (top 2.5% quantile of 500,000 pairwise tests) and in normal-matched tissue from patients with BC (Figure S16). The observation that

30 *ATG10* and *ATP6AP1L* are in different topologically associating domains (TADs) and that the candidate causal variants rs226198 and rs6880209 fall on the boundary between them (Figure S17) suggests that a shared pattern of chromatin condensation does not drive the correlated gene expression but instead by a shared cis-regulatory sequence.

35

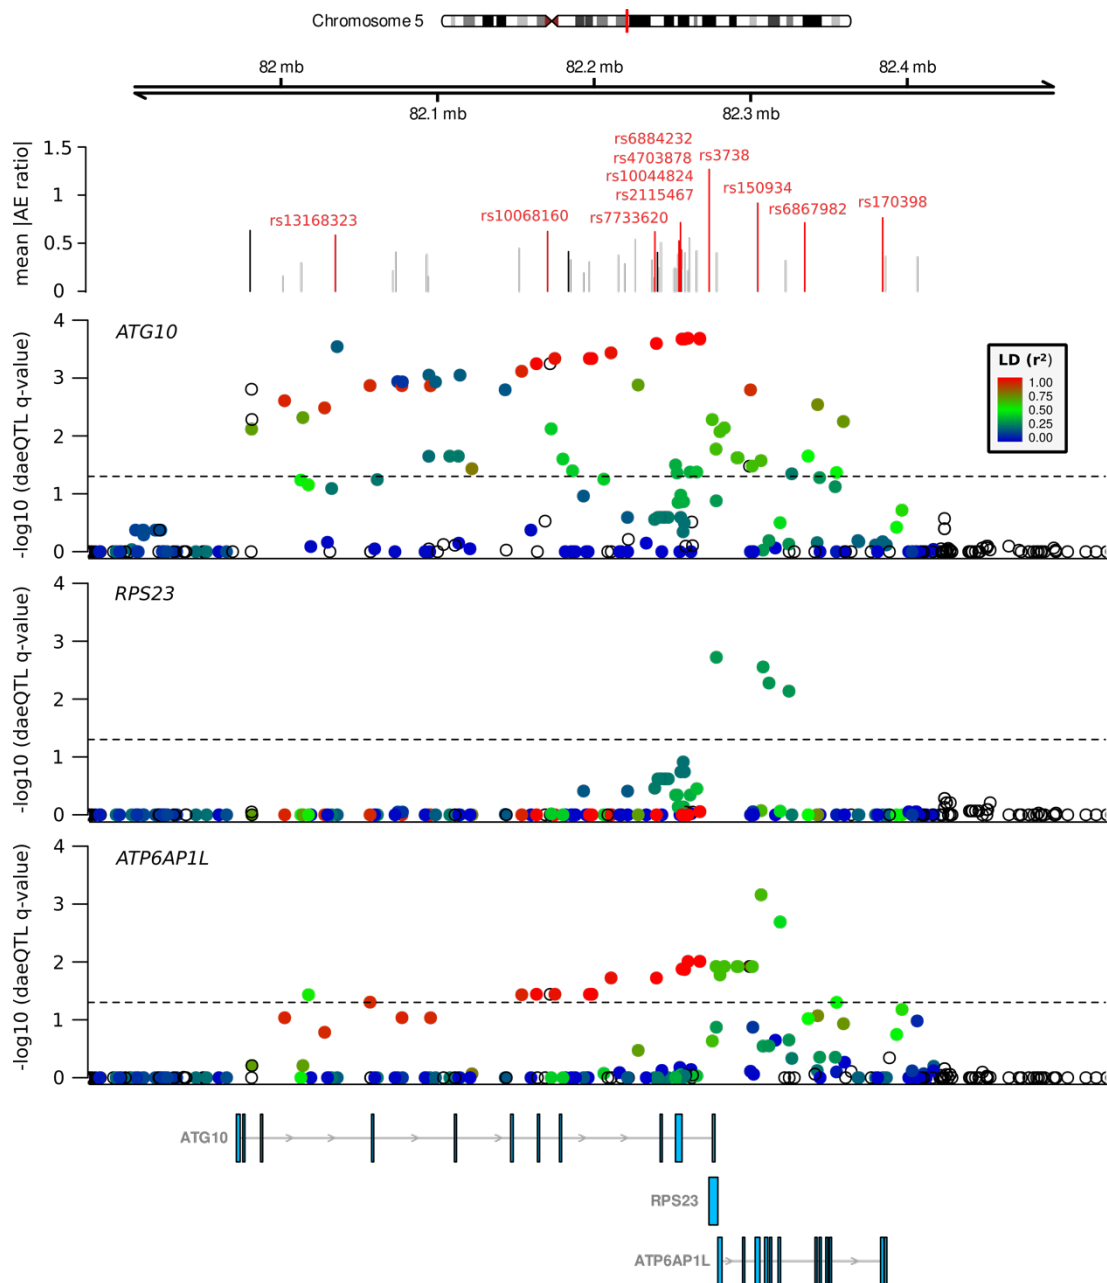

**Figure 5 - Evidence of DAE and daeQTL analysis at the 5q14.1 BC risk locus.** The top track shows the mean values of the absolute AE ratios measured at aeSNPs across the region, with the non-daeSNPs shown in grey, the daeSNPs in black, and the daeSNPs with mapped daeQTLs in red.

5 The subsequent tracks show the daeQTL mapping corrected p-values for *ATG10*, *RPS23*, and *ATP6AP1L*.

10 Since genetic variants affecting mRNA decay or alternative splicing (Robles-Espinoza et al., 2021) can cause allelic expression imbalances, we aimed to explore further the role of alternative transcription in gene expression regulation and in driving risk at the 5q14.1 locus. To accomplish this, we performed an sQTL analysis for *ATG10* that was not

restricted to the candidate risk rSNPs but included all SNPs located within 5 kb upstream and downstream of *ATG10* to increase the stringency of the exercise.

We identified six sQTLs (FDR  $\leq$  5%) in the tumor data, whose minor alleles were associated with changes in the expression of two protein-coding isoforms: decreased expression of ENST00000458350 (one extra exon) and increased expression of ENS3'UTR0282185 (longer 3'UTR) (Figure 7, Figure S18a, Table S12). Interestingly, ENST00000282185 is expressed at significantly lower levels in tumors than in normal-matched tissue, in line with the reported oncogenic effect of UTR length (Mayr and Bartel, 2009), although with a small effect size (fold-change = 1.20) (Figure S19). The strong correlation between sQTL q-values and LD with the lead GWAS SNP rs7707921 ( $r=0.94$ ,  $p$ -value =  $3.15E-12$ , Figure S17b) supports the contribution of alternative transcription of *ATG10* to BC risk. Although no sQTL was detected for *ATG10* in normal breast data (Table S12), sQTL nominal  $p$ -values and LD with rs7707921 were still correlated in normal matched breast samples ( $r = 0.59$ ,  $p$ -value = 0.002) (Figure S20). *ATP6AP1L* did not display sufficient alternative transcription dispersion to allow the sQTL analysis. Subsequent functional analysis of *ATG10*'s sQTLs, and their proxy SNPs (LD  $r^2 \geq 0.95$ ), revealed the prediction of rs111549985 (5'UTR) and rs6884232 (3'UTR) to cause a riboSNitch (a functional RNA structure disrupted by an SNP (Corley et al., 2015)). Although RBP binding data for breast tissue do not exist, these variants have been reported to disrupt the binding of Xrn2 (involved in termination by RNA polymerase II) and of Igf2bp1 (a translation regulator) in K562 cells (Table S13, Table S14), which would require confirmation in breast cells.

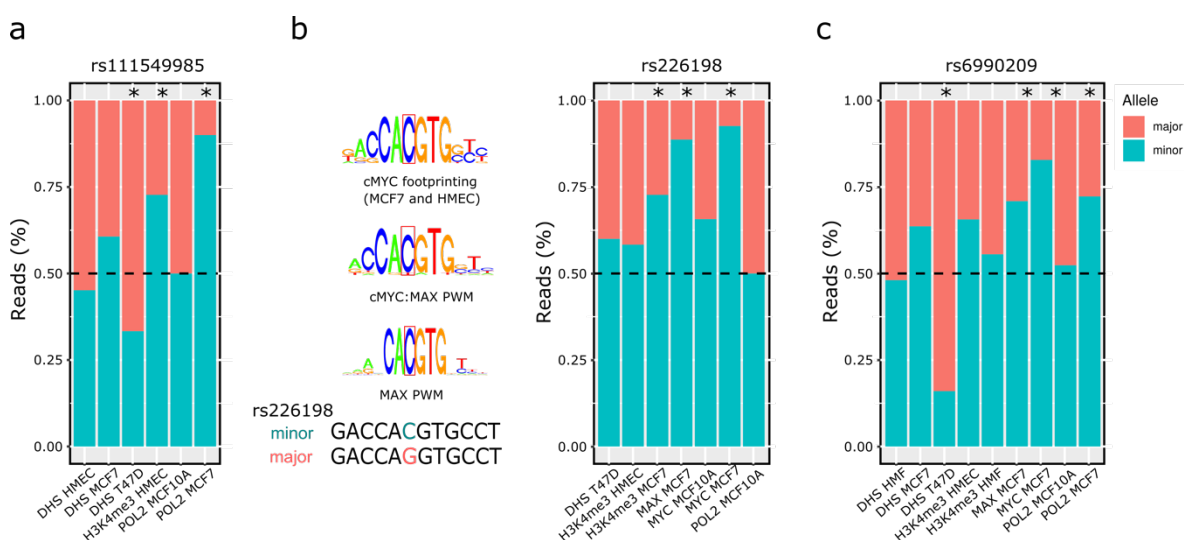

25 **Figure 6 - Variants at the 5q14.1 risk locus associated with differential transcription factor binding.** Allele-specific analysis of the effect of three candidate risk rSNPs — (a) rs111549985, (b)

rs226198, and (c) rs6880209 — on RNA polymerase II (POL2) and transcription factor (TF) binding, DNase I targeting (DHS) and H3K4me3 modification in different heterozygous cell lines. An asterisk indicates statistically significant imbalances (two-sided binomial test,  $p$ -value  $\leq 0.05$ ). Legend: HMEC - human mammary epithelial cells; MCF7 - human breast (adenocarcinoma) cell line; T47D - human breast tumor cell line; MCF10A - human breast epithelial cell line.

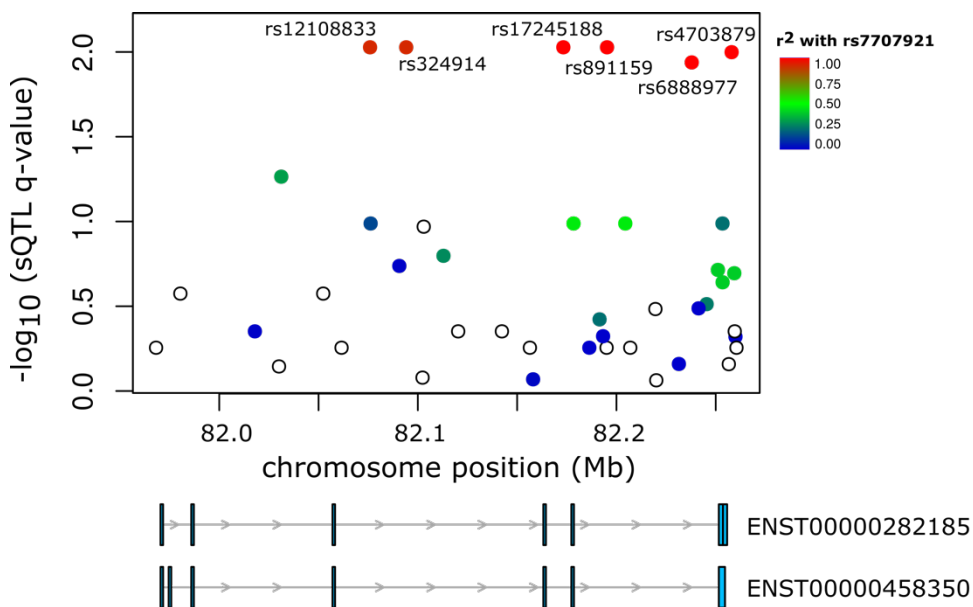

**Figure 7 - Variants at the 5q14.1 risk locus associated with alternative transcription.** Six sQTLs in high LD with rs7707921 were identified for *ATG10*. The  $-\log_{10}(q\text{-value})$  for the sQTL analysis (y-axis) is shown for the 5q14.1-14.2 region (hg38). Color intensity represents the LD ( $r^2$ ) between the analyzed variants and the GWAS lead SNP rs7707921. Below are two *ATG10* transcripts whose expression ratios are associated with the sQTLs.

### Risk model for 5q14.1 links higher expression of *ATG10* and *ATP6AP1L* with protection against BC

Haplotype analysis of the samples included herein revealed two common haplotypes: one harboring the major alleles of all proposed risk-rSNPs and the GWAS lead SNP rs7707921 (frequency of 71.1%) and another with the corresponding minor alleles (frequency of 21.9%) (Figure S21). The proposed risk-rSNPs are among the most significant eQTLs for the two genes: rs111549985 for *ATG10* and rs6880209 for *ATP6AP1L* (Figure S22) (Lonsdale et al., 2013). Therefore, the most common haplotype is associated with an increased risk for BC and lower expression of *ATG10* and *ATP6AP1L* (Figure S21).

Our proposed model for risk at 5q14.1 (Figure 8) establishes that the minor alleles of rs111549985, rs226198, and rs6880209 confer protection against BC by (1) increasing the

binding of POL2 II to the promoter of *ATG10* (driven by rs111549985), (2) the binding of POL2 to the shared promoter of *RPS23/ATP6AP1L* (driven by rs6880209), and (3) the binding of cMYC and MAX to a regulatory region (possible enhancer) (driven by rs226198), increasing the expression of *ATG10* and *ATP6AP1L*. These results reveal a complex regulatory landscape at the 5q14.1-14.2 locus, with multiple independent causal variants.

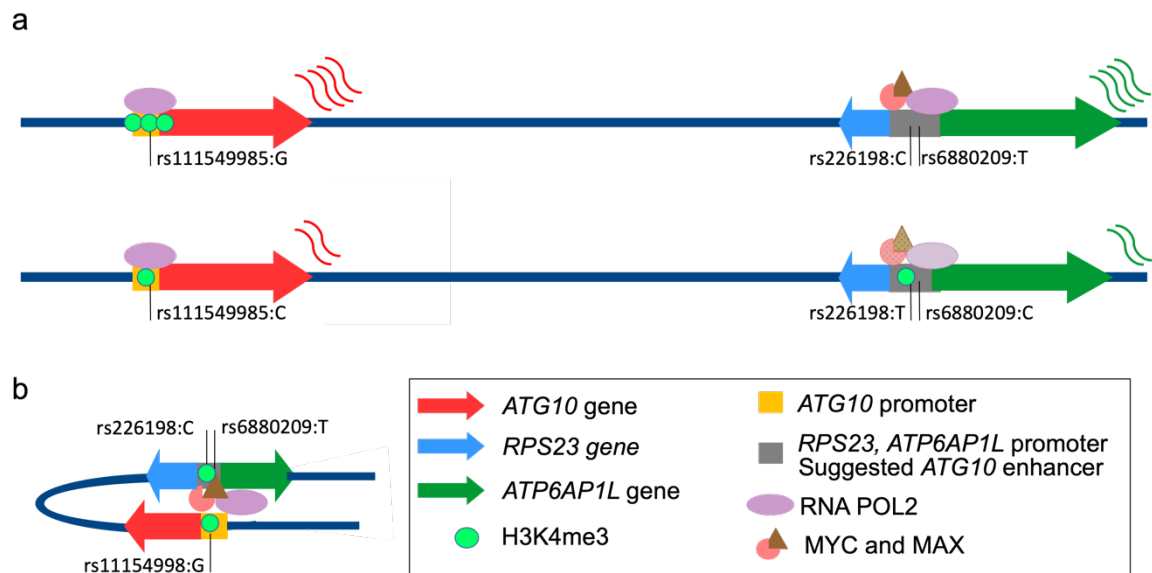

**Figure 8 - Complex risk regulatory landscape of the 5q14.1 locus.** a) Levels of expression of *ATG10* and *ATP6AP1L* genes differ between the haplotypes containing either the minor alleles of rs111549985, rs226198, and rs6880209 (above) or the major ones (below). Colored arrows indicate the direction of transcription of the individual genes, the saturation of the corresponding colors indicates the strength of protein binding, the number of green circles indicates the level of H3K4me3, and the colored curly lines indicate the relative levels of transcript produced. b) Schematic representation of the proposed model for the positive correlation between *ATG10* and *ATP6AP1L* via a shared regulatory region.

## DISCUSSION

Here, we present the first genome-wide map of differentially expressed allelic genes (daeGenes) in normal breast tissue and their genetic determinants (daeQTLs). We found widespread differential allelic expression (DAE) across the genome and identified daeQTLs for 26% of daeGenes. By intersecting this map with GWAS data, we identified risk-daeQTLs and target genes for 93 BC risk loci. Next, we retrieved epigenetic regulatory annotations on all candidate risk-rSNPs (risk-daeQTLs and their proxies in high LD) to prioritize variants with regulatory potential for further functional analysis. We identified 406 variants with strong regulatory potential annotated to 55 different chromosomal bands and candidates for regulating the expression levels of 96 genes. Our results represent a practical and valuable resource for prioritizing loci for follow-up GWASs. As a proof of concept, we functionally characterized the 5q14.1-14.2 BC risk locus in depth and proposed four causal regulatory variants targeting the genes *ATG10* and *ATP6AP1L* acting via multiple allele-specific mechanisms. Our results suggest a complex regulatory landscape underlying BC etiology.

We show that cis-acting variants regulate the expression of 65% of genes in normal breast tissue, with some genes displaying extreme allelic differences of up to 32-fold. Notably, we identified a novel gene with monoallelic expression, *ARCN1*, which warrants further inspection to confirm its imprinting status. An enrichment of daeSNPs at intergenic and intronic regions, as well as noncoding transcripts, noncoding genes, and pseudogenes, concurs with previous reports of predominant allelic imbalances of expression at gene-depleted regions and genes under fewer evolutionary constraints (Campbell et al., 2008; Tung et al., 2009).

To overcome the lack of phasing information, we applied two different tests in the daeQTL mapping, according to the AE ratio distribution, which led to the identification of 54357 variants associated with AE ratios for 6761 genes, both coding and noncoding for proteins. The stringent statistical correction and the use of distance as a covariate in the second mapping approach increased its confidence level but limited the statistical power to identify regulatory variants in lower LD with the daeSNP or located more distally.

We found evidence of expression regulation by cis-acting variants for most reported GWAS loci and believe that alternative mechanisms are at play in the remainder. We identified risk-daeQTLs at 93 different loci, including 72 loci with novel candidate risk target genes (including *NEK10* at 3p24.1 and *ZBED6* and *ZC3H11A* at 1q32.1). Moreover, the initial daeQTL map in normal breast tissue can be further mined whenever new risk variants are identified through GWAS. These results offer a resource platform for functional studies of causal variants and target genes and can help uncover the role of cis-regulatory variation in BC risk.



Finally, we conducted an *in silico* functional analysis of the 5q14.1-14.2 BC risk locus and identified three strong candidate causal variants: rs111549985, rs226198, and rs6880209. We predict that these variants functionally impact TF binding, chromatin state, and gene expression levels of *ATG10* and *ATP6AP1L*. A similar involvement of diverse regulatory mechanisms has been suggested previously for other BC risk loci (Cox et al., 2011; Fachal et al., 2020; Maia et al., 2012). Both *ATG10* (involved in autophagy) and the *ATP6AP1L* pseudogene have been suggested to have roles in cancer (Jo et al., 2017, 2012; Ma et al., 2021; Wang et al., 2014). A variant at *ATG10* (rs7313473) was previously associated with BC risk by regulating promoter activity, and *ATG10* was suggested to act as a tumor suppressor gene in breast tissue (Guo et al., 2018). For *ATP6AP1L*, another variant (rs10514231) was reported to lead to *ATP6AP1L* downregulation by decreasing the binding affinity of TCF7L2 in an intronic regulatory region (Ma et al., 2021). Although we did not find supporting evidence for the same variants, our results show an indirect association between the lower expression of *ATG10* and *ATP6AP1L* and BC risk, suggesting that the downregulation of these two genes may contribute to tumorigenesis.

The advantages of our analysis compared to previous reports of AE in normal breast and tumor tissue (Aguet et al., 2017; Gao et al., 2012; Przytycki and Singh, 2020; Zhang et al., 2009) include using the most significant number of normal breast tissue samples, the genome-wide approach, and the mapping of candidate regulatory variants. We found a similar frequency of daeSNPs to previous reports in other tissues/cell lines but a higher frequency of daeGenes (Ge et al., 2009; Ma et al., 2018; Przytycki and Singh, 2020; Romanel et al., 2015). This higher frequency of daeGenes could be due to our ability to identify genes regulated by common cis-acting variants with weak to large effect sizes (Aguet et al., 2017), a consequence of the imposed conditions to call DAE (allelic change difference of 1.5-fold and the minimum number of heterozygotes). Additionally, we did not integrate the AE ratios of multiple daeSNPs in the same gene due to the absence of phase data and to maximize the information withdrawn from daeSNPs that might be located in different LD blocks. The complex regulatory landscape we identified at the 5q14.1 locus, with multiple cis-acting variants located in the same haplotypes and AE likely resulting from the sum of the effects of each variant, supports this analysis approach. Furthermore, as we propose, a global measure of the AE imbalance at each gene would impair the mapping of daeQTLs at individual daeSNPs and restrict the analysis to genes with multiple daeSNPs. Finally, besides the more commonly studied protein-coding genes, we analyzed noncoding genes and pseudogenes, such as *ATP6AP1L*.

Our results confirm the advantage of using DAE analysis to detect the effect of rSNPs compared to eQTL analysis, as shown by the higher number of daeGenes than eGenes among gwasGenes (Adoue et al., 2014; Almlöf et al., 2012; Pastinen and Hudson,



2004). As a minority of gwasGenes were exclusively eGenes, we believe that DAE and eQTL analyses are complementary and should be used in parallel when possible.

Our use of microarray data could be seen as a limitation compared to RNA-seq data, which have more extensive transcriptome coverage and high quantification accuracy for more extreme allelic imbalances. However, microarrays are a widely used and precise technology for measuring AE (Gao et al., 2012; Ge et al., 2009; Liu et al., 2012), as we confirmed with our validated monoallelic expression of known imprinted genes and with independent PCR analysis. The only RNA-seq dataset with normal breast tissue publicly available is from the GTEx project. However, our approach presents several advantages: 1) we processed and hybridized the DNA and RNA samples in parallel to minimize technical issues, 2) we used total RNA, which includes coding/noncoding genes and spliced/unspliced transcripts, and 3) we showed that the range of gene expression levels of daeGenes was comparable to that of the eGenes from the GTEx dataset. The following steps will be to carry out matched RNA-seq and DNA-seq to combine all the advantages mentioned above and expand the discovery of daeGenes and rSNPs.

Here, we provide a genome-wide list of variants with strong regulating potential for normal breast tissue, a valuable resource for researchers prioritizing GWAS results for functional characterization and those interested in other BC-related traits. The extensive characterization of the regulatory landscape at the 5q14.1 BC risk locus identified candidate causal variants and revealed the multiple mechanisms involved. Further studies of this locus will elucidate the mechanisms involved and the relative contributions of each variant and target gene to the genetic risk. Overall, our results reinforce the importance of cis-regulatory variation as a major player in BC susceptibility and the power of identifying these variants in the disease's tissue of origin - normal breast tissue. They also show that multiple causal variants may co-occur and act via independent cis-regulatory mechanisms at BC risk loci, supporting a broader approach to functional studies.

## DECLARATIONS

### Declaration of interests

The authors declare no competing interests.

### Acknowledgments

5            This work was supported by national Portuguese funding through FCT – Fundação  
para a Ciência e a Tecnologia and CRESC ALGARVE 2020, institutional support CBMR-  
UID/BIM/04773/2013, POCI “01-0145-” EDER-022184 “GenomePT”, the contract DL  
57/2016/CP1361/CT0042 (J.M.X.) and individual postdoctoral fellowship  
SFRH/BPD/99502/2014 (J.M.X.). The research leading to these results has received funding  
10 from the People Programme (Marie Curie Actions) of the European Union’s Seventh  
Framework Programme FP7/2007-2013/under REA grant agreement no. 303745 (A.T.M.), a  
Maratona da Saúde Award (A.T.M.) and a BCRF project Grant.

            The authors would also like to thank Dr Nuno Barbosa-Morais at IMM for the  
excellent scientific discussions and the support given by the Unidade de Apoio à  
15 Investigação (UAIC) at Universidade do Algarve (UAlg), particularly Mr. Vitor Morais, and the  
Informatics Services of UAlg.

### Authors’ Contributions

            Conceptualization: Ponder BAJ, Maia AT  
            Investigation: de Almeida BP, Rocha CL, Rosli N, O’Reilly M, Maia AT  
20            Formal Analysis: Xavier JM, Magno Ramiro, de Almeida BP, Jacinta-Fernandes A,  
Russell R, Samarajiwa S, Dunning M, António M. Maia, Maia AT  
            Funding acquisition: Ponder BAJ, Maia AT  
            Project administration: Maia AT  
            Writing – original draft: Xavier JM, Maia AT  
25            Writing – review & editing: All authors

### Web Resources

            The datasets supporting the conclusions of this article are available in the following  
repositories: GWAS Catalog [<https://www.ebi.ac.uk/gwas>], Ensembl database (annotated to  
GRCh38.p13) [<https://www.ensembl.org>], GTEx Project (v7 and v8)  
30 [<https://www.gtexportal.org>], microarray data from GEO [<https://www.ncbi.nlm.nih.gov/geo/>]  
under accession number GSE35023.

## Data and code availability

The code for this article is available here:

<https://github.com/maialab/DaeBreastMicroarrays>

## REFERENCES

- Adoue V, Schiavi A, Light N, Almlöf JC, Lundmark P, Ge B, et al. Allelic expression mapping across cellular lineages to establish impact of non-coding SNPs. *Mol Syst Biol* 2014;10:754. <https://doi.org/10.15252/msb.20145114>.  
5
- Aguet F, Brown AA, Castel SE, Davis JR, He Y, Jo B, et al. Genetic effects on gene expression across human tissues. *Nature* 2017;550:204–13. <https://doi.org/10.1038/nature24277>.
- Almlöf JC, Lundmark P, Lundmark A, Ge B, Maouche S, Göring HHH, et al. Powerful identification of cis-regulatory SNPs in human primary monocytes using allele-specific gene expression. *Plos One* 2012;7:e52260. <https://doi.org/10.1371/journal.pone.0052260>.  
10
- Barrett JC, Fry B, Maller J, Daly MJ. Haploview: analysis and visualization of LD and haplotype maps. *Bioinformatics* 2005;21:263–5. <https://doi.org/10.1093/bioinformatics/bth457>.
- Bjornsson HT, Albert TJ, Ladd-Acosta CM, Green RD, Rongione MA, Middle CM, et al. SNP-specific array-based allele-specific expression analysis. *Genome Res* 2008;18:771–9. <https://doi.org/10.1101/gr.073254.107>.  
15
- Boyle AP, Hong EL, Hariharan M, Cheng Y, Schaub MA, Kasowski M, et al. Annotation of functional variation in personal genomes using RegulomeDB. *Genome Res* 2012;22:1790–7. <https://doi.org/10.1101/gr.137323.112>.
- Campbell CD, Kirby A, Nemesh J, Daly MJ, Hirschhorn JN. A survey of allelic imbalance in F1 mice. *Genome Res* 2008;18:555–63. <https://doi.org/10.1101/gr.068692.107>.  
20
- Colaprico A, Silva TC, Olsen C, Garofano L, Cava C, Garolini D, et al. TCGAbiolinks: an R/Bioconductor package for integrative analysis of TCGA data. *Nucleic Acids Res* 2016;44:e71–e71. <https://doi.org/10.1093/nar/gkv1507>.
- Consortium TGte, Ardlie KG, Deluca DS, Segre AV, Sullivan TJ, Young TR, et al. The Genotype-Tissue Expression (GTEx) pilot analysis: Multitissue gene regulation in humans. *Science* 2015;348:648–60. <https://doi.org/10.1126/science.1262110>.  
25
- Corley M, Solem A, Qu K, Chang HY, Laederach A. Detecting riboSNitches with RNA folding algorithms: a genome-wide benchmark. *Nucleic Acids Res* 2015;43:1859–68. <https://doi.org/10.1093/nar/gkv010>.
- Cox DG, Simard J, Sinnett D, Hamdi Y, Soucy P, Ouimet M, et al. Common variants of the BRCA1 wild-type allele modify the risk of breast cancer in BRCA1 mutation carriers. *Hum Mol Genet* 2011;20:4732–47. <https://doi.org/10.1093/hmg/ddr388>.  
30
- Dang CV. MYC on the path to cancer. *Cell* 2012;149:22–35. <https://doi.org/10.1016/j.cell.2012.03.003>.

- Darabi H, McCue K, Beesley J, Michailidou K, Nord S, Kar S, et al. Polymorphisms in a Putative Enhancer at the 10q21.2 Breast Cancer Risk Locus Regulate NRBF2 Expression. *Am J Hum Genetics* 2015;97:22–34. <https://doi.org/10.1016/j.ajhg.2015.05.002>.
- 5 Dunham I, Kundaje A, Aldred SF, Collins PJ, Davis CA, Doyle F, et al. An integrated encyclopedia of DNA elements in the human genome. *Nature* 2012;489:57–74. <https://doi.org/10.1038/nature11247>.
- Dunning AM, Michailidou K, Kuchenbaecker KB, Thompson D, French JD, Beesley J, et al. Breast cancer risk variants at 6q25 display different phenotype associations and regulate ESR1, RMND1 and CCDC170. *Nat Genet* 2016;48:374–86. <https://doi.org/10.1038/ng.3521>.
- 10 Fachal L, Aschard H, Beesley J, Barnes DR, Allen J, Kar S, et al. Fine-mapping of 150 breast cancer risk regions identifies 191 likely target genes. *Nat Genet* 2020;52:56–73. <https://doi.org/10.1038/s41588-019-0537-1>.
- 15 Floc'hlay S, Wong E, Zhao B, Viales RR, Thomas-Chollier M, Thieffry D, et al. Cis-acting variation is common across regulatory layers but is often buffered during embryonic development. *Genome Res* 2020;31:gr.266338.120. <https://doi.org/10.1101/gr.266338.120>.
- Forton JT, Udalova IA, Campino S, Rockett KA, Hull J, Kwiatkowski DP. Localization of a long-range cis-regulatory element of IL13 by allelic transcript ratio mapping. *Genome Res* 2007;17:82–7. <https://doi.org/10.1101/gr.5663007>.
- 20 Gallagher MD, Chen-Plotkin AS. The Post-GWAS Era: From Association to Function. *Am J Hum Genetics* 2018;102:717–30. <https://doi.org/10.1016/j.ajhg.2018.04.002>.
- Gao C, Devarajan K, Zhou Y, Slater CM, Daly MB, Chen X. Identifying breast cancer risk loci by global differential allele-specific expression (DASE) analysis in mammary epithelial transcriptome. *Bmc Genomics* 2012;13:570–570. <https://doi.org/10.1186/1471-2164-13-570>.
- 25 Ge B, Pokholok DK, Kwan T, Grundberg E, Morcos L, Verlaan DJ, et al. Global patterns of cis variation in human cells revealed by high-density allelic expression analysis. *Nat Genet* 2009;41:1216–22. <https://doi.org/10.1038/ng.473>.
- Ghoussaini M, French JD, Michailidou K, Nord S, Beesley J, Canisus S, et al. Evidence that the 5p12 Variant rs10941679 Confers Susceptibility to Estrogen-Receptor-Positive Breast Cancer through FGF10 and MRPS30 Regulation. *Am J Hum Genetics* 2016;99:903–11. <https://doi.org/10.1016/j.ajhg.2016.07.017>.
- 30 Gimelbrant A, Hutchinson JN, Thompson BR, Chess A. Widespread Monoallelic Expression on Human Autosomes. *Science* 2007;318:1136–40. <https://doi.org/10.1126/science.1148910>.
- Gonzalez JN, Zweig AS, Speir ML, Schmelter D, Rosenbloom KR, Raney BJ, et al. The UCSC Genome Browser database: 2021 update. *Nucleic Acids Res* 2021;49:D1046–57. <https://doi.org/10.1093/nar/gkaa1070>.
- 35 Goovaerts T, Steyaert S, Vandenbussche CA, Galle J, Thas O, Criekinge WV, et al. A comprehensive overview of genomic imprinting in breast and its deregulation in cancer. *Nat Commun* 2018;9:4120. <https://doi.org/10.1038/s41467-018-06566-7>.

- Guo X, Lin W, Bao J, Cai Q, Pan X, Bai M, et al. A Comprehensive cis-eQTL Analysis Revealed Target Genes in Breast Cancer Susceptibility Loci Identified in Genome-wide Association Studies. *Am J Hum Genet* 2018;102:890–903.  
<https://doi.org/10.1016/j.ajhg.2018.03.016>.
- 5 Hagan JP, O’Neill BL, Stewart CL, Kozlov SV, Croce CM. At Least Ten Genes Define the Imprinted Dlk1-Dio3 Cluster on Mouse Chromosome 12qF1. *Plos One* 2009;4:e4352.  
<https://doi.org/10.1371/journal.pone.0004352>.
- Hamdi Y, Soucy P, Adoue V, Michailidou K, Canisius S, Lemaçon A, et al. Association of breast cancer risk with genetic variants showing differential allelic expression: Identification of a novel breast cancer susceptibility locus at 4q21. *Oncotarget* 2014;5:80140–63.  
10 <https://doi.org/10.18632/oncotarget.12818>.
- Hochberg Y, Benjamini Y. More powerful procedures for multiple significance testing. *Stat Med* 1990;9:811–8. <https://doi.org/10.1002/sim.4780090710>.
- Howe FS, Fischl H, Murray SC, Mellor J. Is H3K4me3 instructive for transcription activation? *Bioessays* 2017;39:1–12. <https://doi.org/10.1002/bies.201600095>.
- 15 Ignatiadis N, Klaus B, Zaugg J, Huber W. Data-driven hypothesis weighting increases detection power in genome-scale multiple testing. *Nat Methods* 2016;13:577–80.  
<https://doi.org/10.1038/nmeth.3885>.
- Jo YK, Kim SC, Park IJ, Park SJ, Jin D-H, Hong S-W, et al. Increased expression of ATG10 in colorectal cancer is associated with lymphovascular invasion and lymph node metastasis. *Plos One* 2012;7:e52705. <https://doi.org/10.1371/journal.pone.0052705>.
- 20 Jo YK, Roh SA, Lee H, Park NY, Choi ES, Oh J-H, et al. Polypyrimidine tract-binding protein 1-mediated down-regulation of ATG10 facilitates metastasis of colorectal cancer cells. *Cancer Lett* 2017;385:21–7. <https://doi.org/10.1016/j.canlet.2016.11.002>.
- 25 Kent WJ, Sugnet CW, Furey TS, Roskin KM, Pringle TH, Zahler AM, et al. The Human Genome Browser at UCSC. *Genome Res* 2002;12:996–1006. <https://doi.org/10.1101/gr.229102>.
- Kundaje A, Meuleman W, Ernst J, Bilenky M, Yen A, Heravi-Moussavi A, et al. Integrative analysis of 111 reference human epigenomes. *Nature* 2015;518:317–30.  
<https://doi.org/10.1038/nature14248>.
- 30 Li Y, Willer CJ, Ding J, Scheet P, Abecasis GR. MaCH: using sequence and genotype data to estimate haplotypes and unobserved genotypes. *Genet Epidemiol* 2010;34:816–34.  
<https://doi.org/10.1002/gepi.20533>.
- Liu R, Maia A-T, Russell R, Caldas C, Ponder BA, Ritchie ME. Allele-specific expression analysis methods for high-density SNP microarray data. *Bioinformatics* 2012;28:1102–8.  
35 <https://doi.org/10.1093/bioinformatics/bts089>.
- Lonsdale J, Thomas J, Salvatore M, Phillips R, Lo E, Shad S, et al. The Genotype-Tissue Expression (GTEx) project. *Nat Genet* 2013;45:580–5. <https://doi.org/10.1038/ng.2653>.

- Ma S, Ren N, Huang Q. rs10514231 Leads to Breast Cancer Predisposition by Altering ATP6AP1L Gene Expression. *Cancers* 2021;13:3752. <https://doi.org/10.3390/cancers13153752>.
- 5 Ma X, Liu Yu, Liu Yanling, Alexandrov LB, Edmonson MN, Gawad C, et al. Pan-cancer genome and transcriptome analyses of 1,699 paediatric leukaemias and solid tumours. *Nature* 2018;555:371–6. <https://doi.org/10.1038/nature25795>.
- MacArthur J, Bowler E, Cerezo M, Gil L, Hall P, Hastings E, et al. The new NHGRI-EBI Catalog of published genome-wide association studies (GWAS Catalog). *Nucleic Acids Res* 2017;45:D896–901. <https://doi.org/10.1093/nar/gkw1133>.
- 10 Magno R, Maia A-T. gwasrapidd: an R package to query, download and wrangle GWAS catalog data. *Bioinformatics* 2019. <https://doi.org/10.1093/bioinformatics/btz605>.
- Maia A-T, Antoniou AC, O’Reilly M, Samarajiwa S, Dunning M, Kartsonaki C, et al. Effects of BRCA2 cis-regulation in normal breast and cancer risk amongst BRCA2 mutation carriers. *Breast Cancer Res* 2012;14:R63. <https://doi.org/10.1186/bcr3169>.
- 15 Maia A-T, Spiteri I, Lee AJ, O’Reilly M, Jones L, Caldas C, et al. Extent of differential allelic expression of candidate breast cancer genes is similar in blood and breast. *Breast Cancer Res* 2009;11:R88. <https://doi.org/10.1186/bcr2458>.
- Mao F, Xiao L, Li X, Liang J, Teng H, Cai W, et al. RBP-Var: a database of functional variants involved in regulation mediated by RNA-binding proteins. *Nucleic Acids Res* 2016;44:D154–63. <https://doi.org/10.1093/nar/gkv1308>.
- 20 Maurano MT, Humbert R, Rynes E, Thurman RE, Haugen E, Wang H, et al. Systematic Localization of Common Disease-Associated Variation in Regulatory DNA. *Science* 2012;337:1190–5. <https://doi.org/10.1126/science.1222794>.
- Mayr C, Bartel DP. Widespread Shortening of 3’UTRs by Alternative Cleavage and Polyadenylation Activates Oncogenes in Cancer Cells. *Cell* 2009;138:673–84. <https://doi.org/10.1016/j.cell.2009.06.016>.
- 25 Meyer KB, Maia A-T, O’Reilly M, Ghossaini M, Prathalingam R, Porter-Gill P, et al. A Functional Variant at a Prostate Cancer Predisposition Locus at 8q24 Is Associated with PVT1 Expression. *Plos Genet* 2011;7:e1002165. <https://doi.org/10.1371/journal.pgen.1002165>.
- 30 Meyer KB, Maia A-T, O’Reilly M, Teschendorff AE, Chin S-F, Caldas C, et al. Allele-Specific Up-Regulation of FGFR2 Increases Susceptibility to Breast Cancer. *Plos Biol* 2008;6:e108. <https://doi.org/10.1371/journal.pbio.0060108>.
- Michailidou K, Beesley J, Lindstrom S, Canisius S, Dennis J, Lush MJ, et al. Genome-wide association analysis of more than 120,000 individuals identifies 15 new susceptibility loci for breast cancer. *Nat Genet* 2015;47:373–80. <https://doi.org/10.1038/ng.3242>.
- 35



- Michailidou K, Lindström S, Dennis J, Beesley J, Hui S, Kar S, et al. Association analysis identifies 65 new breast cancer risk loci. *Nature* 2017;551:92–4. <https://doi.org/10.1038/nature24284>.
- 5 Monlong J, Calvo M, Ferreira PG, Guigó R. Identification of genetic variants associated with alternative splicing using sQTLseekeR. *Nat Commun* 2014;5:4698. <https://doi.org/10.1038/ncomms5698>.
- Pastinen T, Ge B, Hudson TJ. Influence of human genome polymorphism on gene expression. *Hum Mol Genet* 2006;15 Spec No 1:R9-16. <https://doi.org/10.1093/hmg/ddl044>.
- 10 Pastinen T, Hudson TJ. Cis-Acting Regulatory Variation in the Human Genome. *Science* 2004;306:647–50. <https://doi.org/10.1126/science.1101659>.
- Paz I, Kostı I, Ares M, Cline M, Mandel-Gutfreund Y. RBPmap: a web server for mapping binding sites of RNA-binding proteins. *Nucleic Acids Res* 2014;42:W361–7. <https://doi.org/10.1093/nar/gku406>.
- 15 Przytycki PF, Singh M. Differential Allele-Specific Expression Uncovers Breast Cancer Genes Dysregulated by Cis Noncoding Mutations. *Cell Syst* 2020;10:193-203.e4. <https://doi.org/10.1016/j.cels.2020.01.002>.
- Robles-Espinoza CD, Mohammadi P, Bonilla X, Gutierrez-Arcelus M. Allele-specific expression: applications in cancer and technical considerations. *Curr Opin Genet Dev* 2021;66:10–9. <https://doi.org/10.1016/j.gde.2020.10.007>.
- 20 Romanel A, Lago S, Prandi D, Sboner A, Demichelis F. ASEQ: fast allele-specific studies from next-generation sequencing data. *Bmc Med Genomics* 2015;8:9. <https://doi.org/10.1186/s12920-015-0084-2>.
- 25 Seitz H, Youngson N, Lin S-P, Dalbert S, Paulsen M, Bachellerie J-P, et al. Imprinted microRNA genes transcribed antisense to a reciprocally imprinted retrotransposon-like gene. *Nat Genet* 2003;34:261–2. <https://doi.org/10.1038/ng1171>.
- Storey J, Bass A, Dabney A, Robinson D. qvalue: Q-value estimation for false discovery rate control. 2021.
- 30 Thorvaldsdóttir H, Robinson JT, Mesirov JP. Integrative Genomics Viewer (IGV): high-performance genomics data visualization and exploration. *Brief Bioinform* 2013;14:178–92. <https://doi.org/10.1093/bib/bbs017>.
- Tierling S, Dalbert S, Schoppenhorst S, Tsai C-E, Oligier S, Ferguson-Smith AC, et al. High-resolution map and imprinting analysis of the Gtl2–Dnchc1 domain on mouse chromosome 12. *Genomics* 2006;87:225–35. <https://doi.org/10.1016/j.ygeno.2005.09.018>.
- 35 Tung J, Fédrigo O, Haygood R, Mukherjee S, Wray GA. Genomic features that predict allelic imbalance in humans suggest patterns of constraint on gene expression variation. *Mol Biol Evol* 2009;26:2047–59. <https://doi.org/10.1093/molbev/msp113>.

- Udler MS, Ahmed S, Healey CS, Meyer K, Struewing J, Maranian M, et al. Fine scale mapping of the breast cancer 16q12 locus. *Hum Mol Genet* 2010;19:2507–15.  
<https://doi.org/10.1093/hmg/ddq122>.
- 5 Wang Y, Huang J-W, Castella M, Huntsman DG, Taniguchi T. p53 Is Positively Regulated by miR-542-3p. *Cancer Res* 2014;74:3218–27. <https://doi.org/10.1158/0008-5472.can-13-1706>.
- Ward LD, Kellis M. HaploReg: a resource for exploring chromatin states, conservation, and regulatory motif alterations within sets of genetically linked variants. *Nucleic Acids Res* 2012;40:D930–4. <https://doi.org/10.1093/nar/gkr917>.
- 10 Wendt C, Margolin S. Identifying breast cancer susceptibility genes – a review of the genetic background in familial breast cancer. *Acta Oncol* 2019;58:1–12.  
<https://doi.org/10.1080/0284186x.2018.1529428>.
- Xiao R, Scott LJ. Detection of cis-acting regulatory SNPs using allelic expression data. *Genet Epidemiol* 2011;35:515–25. <https://doi.org/10.1002/gepi.20601>.
- 15 Yates A, Beal K, Keenan S, McLaren W, Pignatelli M, Ritchie GRS, et al. The Ensembl REST API: Ensembl Data for Any Language. *Bioinformatics* 2015;31:143–5.  
<https://doi.org/10.1093/bioinformatics/btu613>.
- Zhang K, Li JB, Gao Y, Egli D, Xie B, Deng J, et al. Digital RNA Allelotyping Reveals Tissue-specific and Allele-specific Gene Expression in Human. *Nat Methods* 2009;6:613–8.  
20 <https://doi.org/10.1038/nmeth.1357>.
- Zhang Y, Manjunath M, Zhang S, Chasman D, Roy S, Song JS. Integrative genomic analysis predicts causative cis-regulatory mechanisms of the breast cancer-associated genetic variant rs4415084. *Cancer Res* 2018;78:1579–91. <https://doi.org/10.1158/0008-5472.can-17-3486>.
- Zhu Y, Xu G, Yang YT, Xu Z, Chen X, Shi B, et al. POSTAR2: deciphering the post-transcriptional regulatory logics. *Nucleic Acids Res* 2019;47:D203–11.  
25 <https://doi.org/10.1093/nar/gky830>.

## FIGURES

Mapping of cis-regulatory variants by differential allelic expression analysis identifies candidate causal variants and target genes of 41 breast cancer risk loci

Joana M. Xavier, et al.

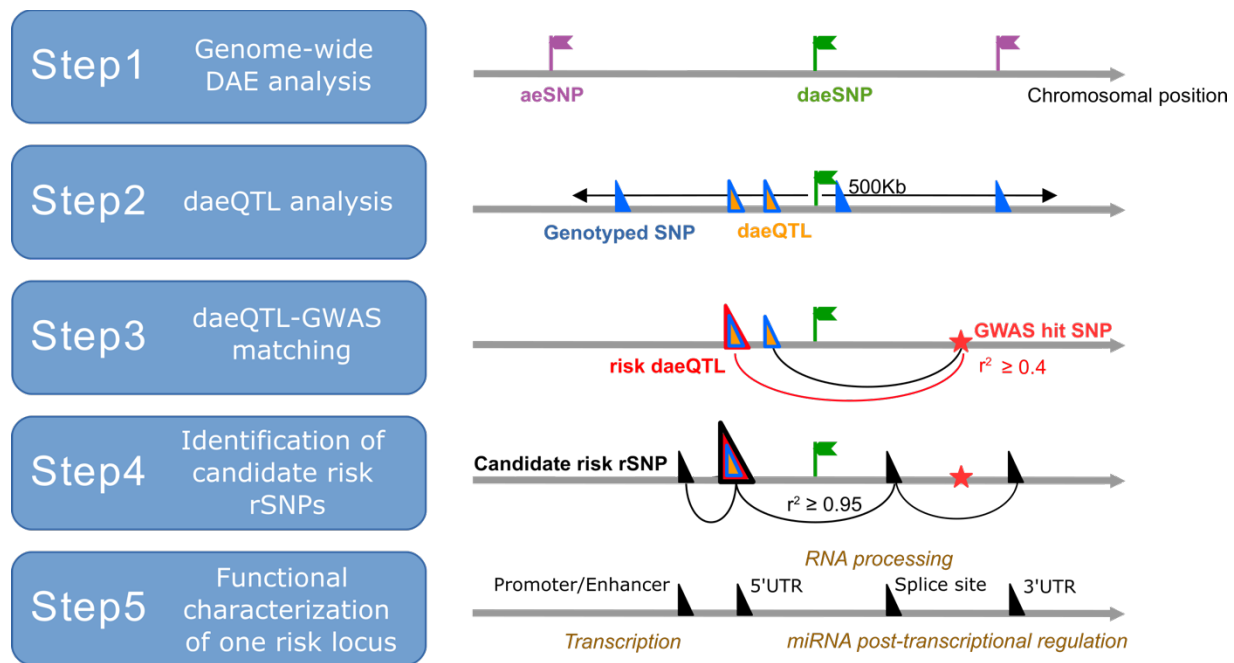

**Figure 1 - Strategy framework used to identify causal variants and target genes associated with breast cancer risk.** Legend: *aeSNP* - an SNP that passed quality control and at which allelic expression (AE) was measured; *daeSNP* - an *aeSNP* showing differential AE (DAE); *Genotyped SNP* - an SNP with genotype information (either genotyped in the study or imputed) and tested for association with AE ratios; *daeQTL* - an SNP associated with AE ratios measured for a *daeSNP*; *risk-daeQTL* - a *daeQTL* with an  $r^2 \geq 0.4$  with a GWAS hit variant; *candidate risk rSNP* - a variant with an  $r^2 \geq 0.95$  with the *risk-daeQTL*.

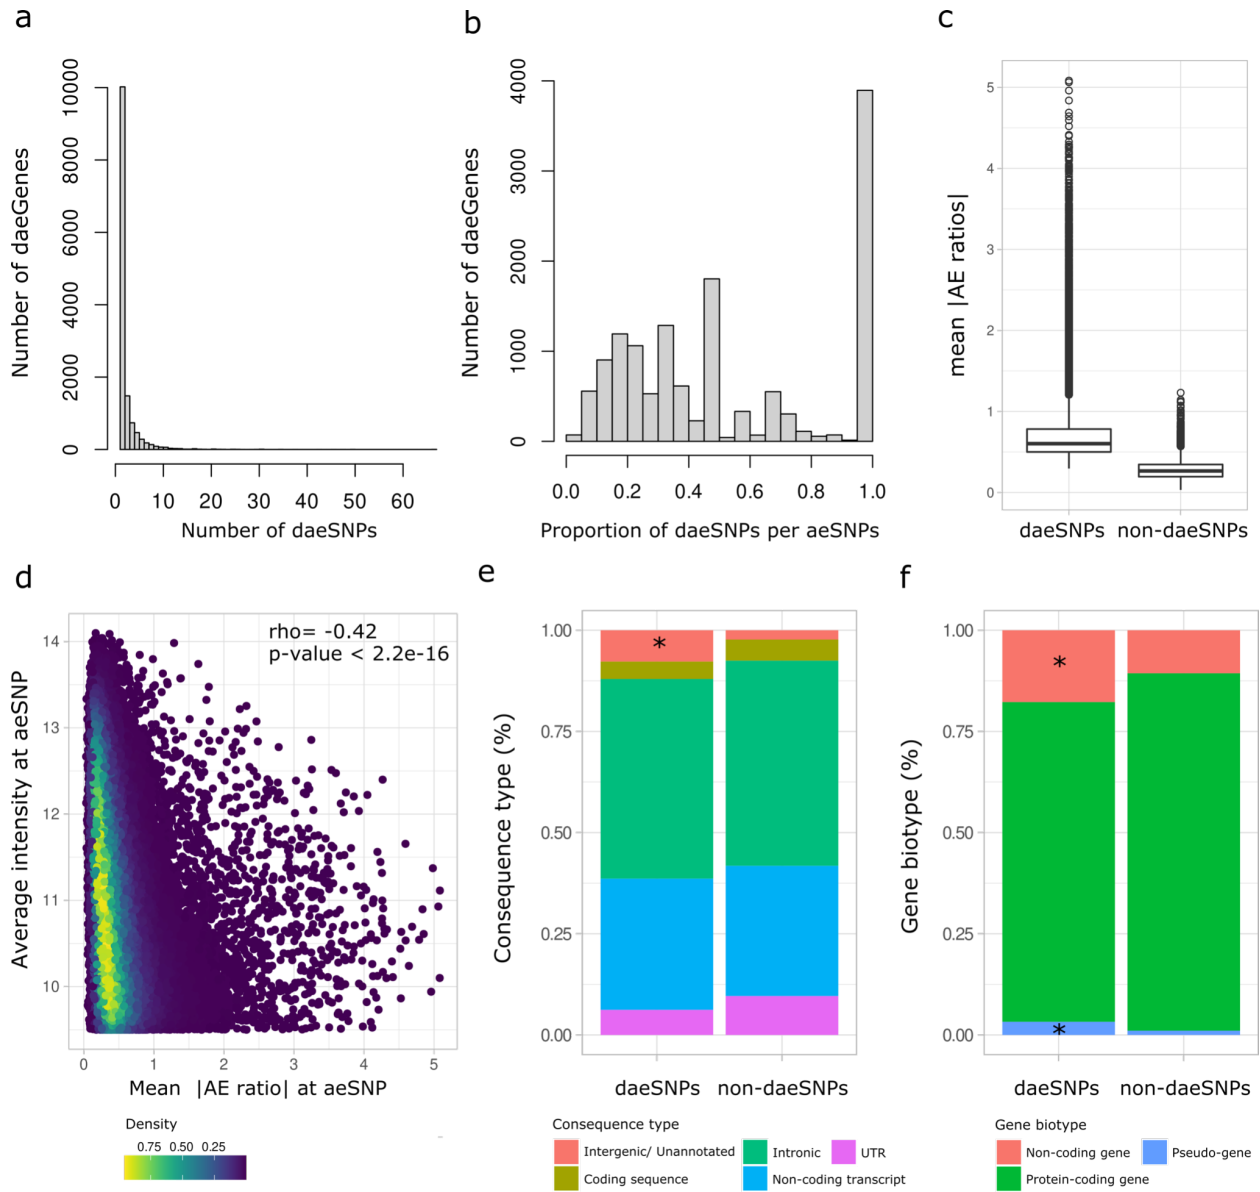

**Figure 2 - Characterization of aeSNPs.** a) Histogram of the rank number of daeSNPs identified per gene across 17135 annotated genes. b) Histogram of the rank proportion of daeSNPs per aeSNPs identified per gene. c) Box plot with the distribution of the mean of the absolute values of AE ratios across heterozygous individuals measured at non-daeSNPs and daeSNPs. d) Distribution of the mean absolute values of AE ratios at aeSNPs according to the average intensity of both alleles at aeSNPs in the microarray Spearman's results of a Spearman's correlation test are shown. e) and f) Relative frequency of aeSNPs and daeSNPs according to consequence type and gene biotype, respectively. (\*) denotes the classes for which daeSNPs were enriched ( $p < 0.01$ ).

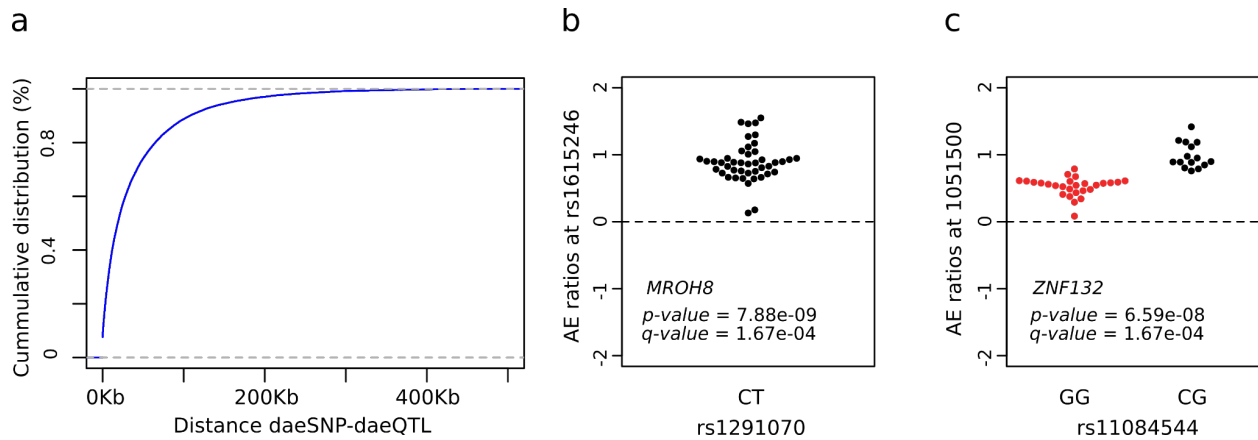

**Figure 3 - Mapping of variants associated with differential allelic expression.** a) Empirical cumulative distribution for the distance between the daeSNP and corresponding mapped daeQTL. b) and c) daeQTL mapping result for the most significant daeQTL identified for *MROH8* using a one-sample Wilcox test and for *ZNF132* using a two-sample Wilcox test. The AE ratios calculated at the daeSNPs are represented on the y-axis in the two panels and stratified according to genotype at the candidate SNP (black dots represent heterozygous individuals, and red dots represent homozygous individuals).

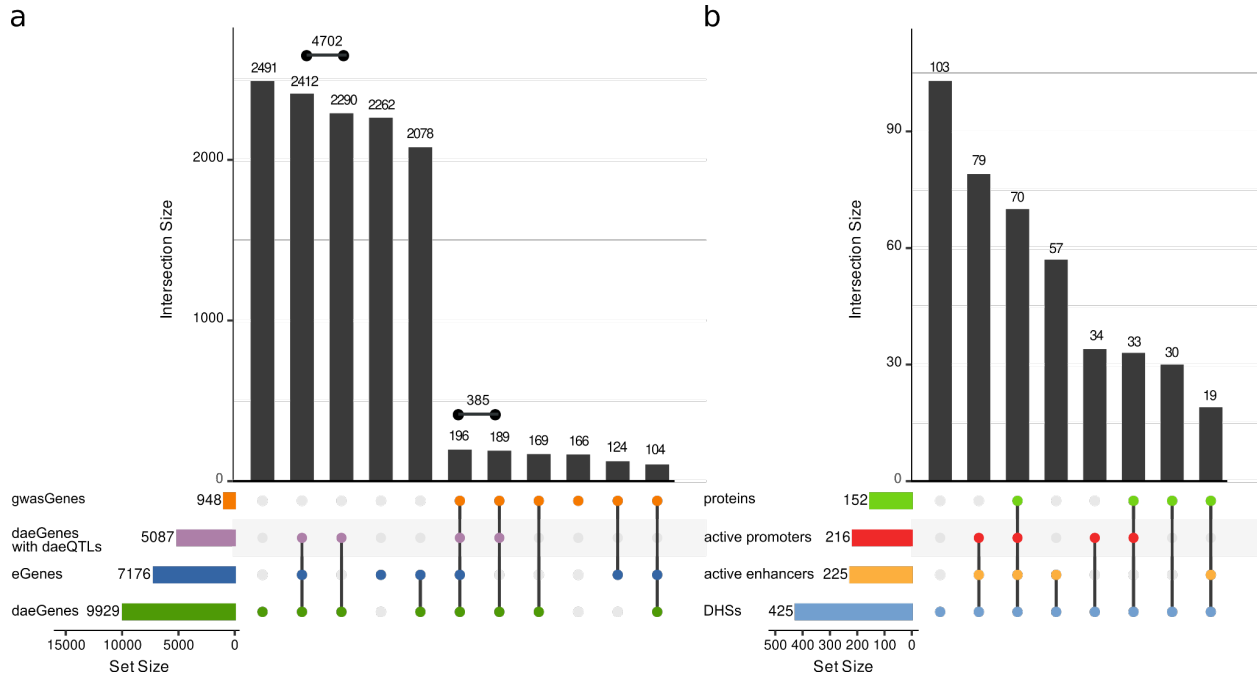

**Figure 4 – Summary of colocalization analyses for daeGenes and risk-daeQTLs. a)** UpSet plot for 15,706 genes tested for DAE and eQTL (GTEx breast mammary tissue). Legend: daeGenes - genes identified as having differential allelic expression in normal breast tissue; eGenes - genes reported as being eQTL genes in GTEx mammary tissue data ( $q\text{-value} \leq 0.05$ ); gwasGenes - genes where GWAS index SNPs or proxies ( $r^2 \geq 0.4$ ) are located; daeGenes with daeQTL mapping - daeGenes for which daeQTLs were identified. **b)** UpSet plot for 425 variants located in DHSs, according to the presence of protein binding and location in active promoters and/or enhancers in breast cell lines.

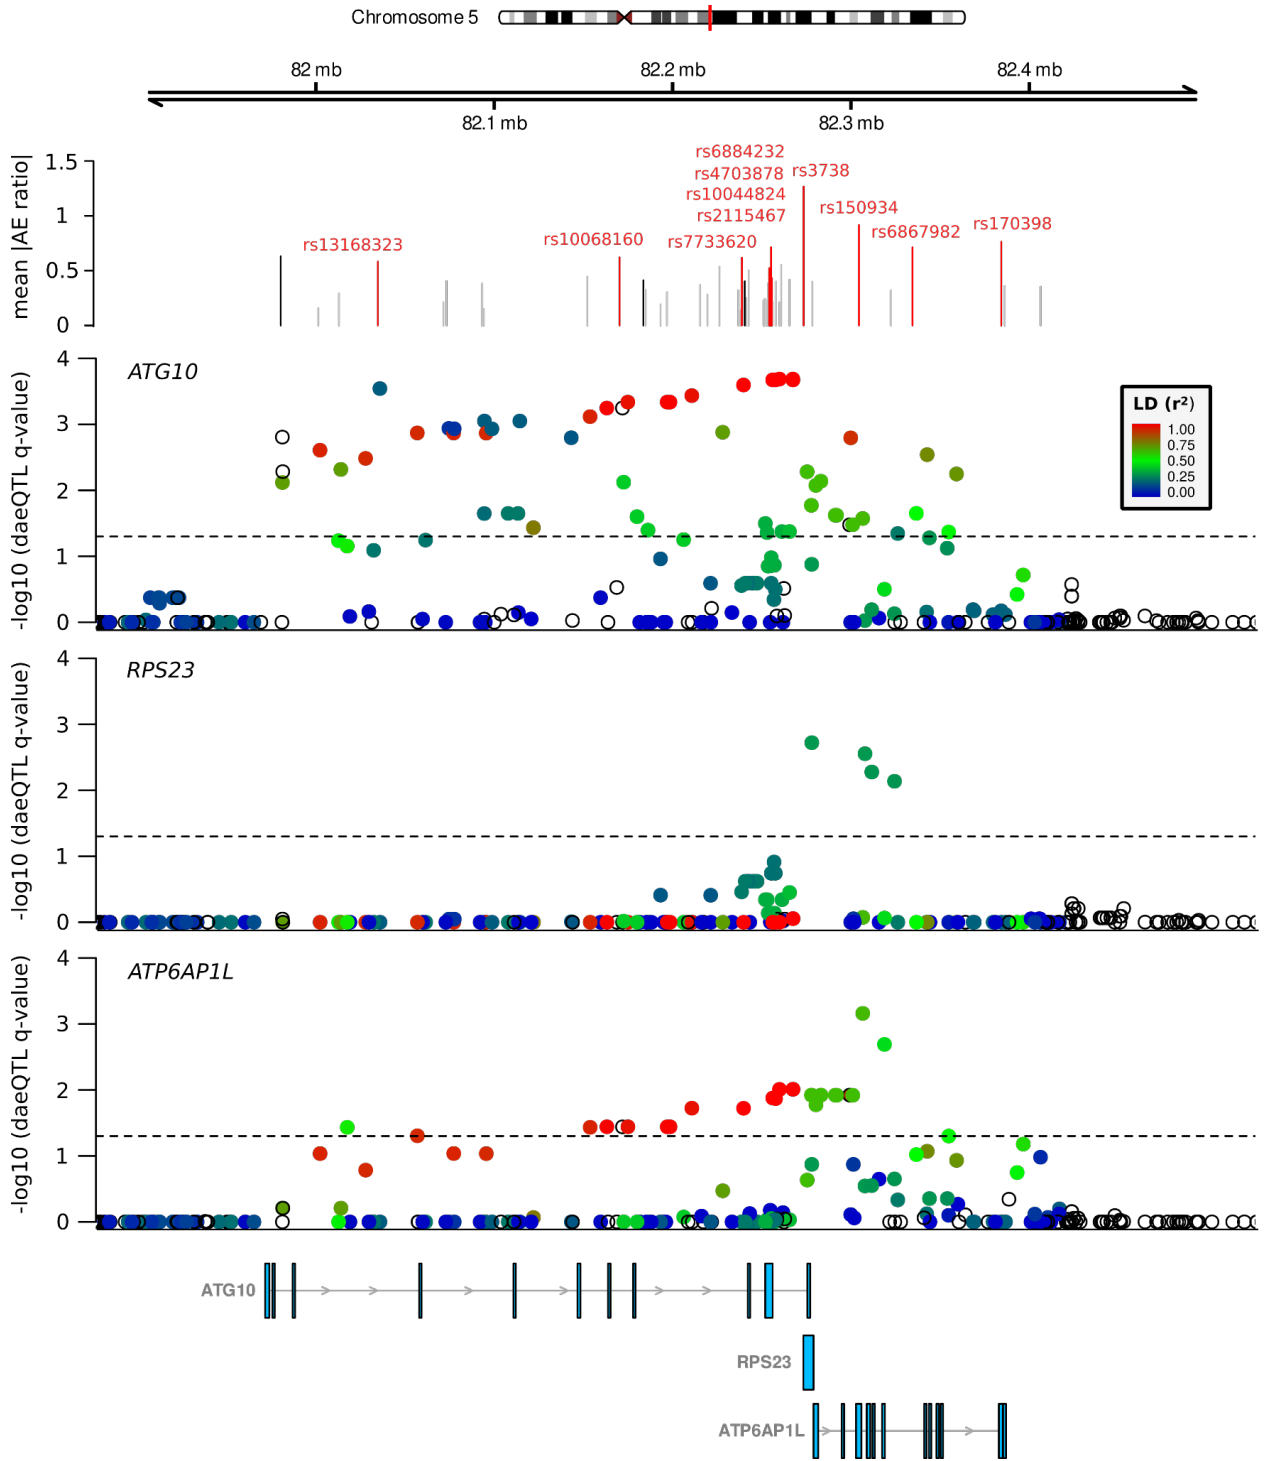

**Figure 5 - Evidence of DAE and daeQTL analysis at the 5q14.1 BC risk locus.** The top track shows the mean values of the absolute AE ratios measured at aeSNPs across the region, with the non-daeSNPs shown in grey, the daeSNPs in black, and the daeSNPs with mapped daeQTLs in red. The subsequent tracks show the daeQTL mapping corrected p-values for *ATG10*, *RPS23*, and *ATP6AP1L*.

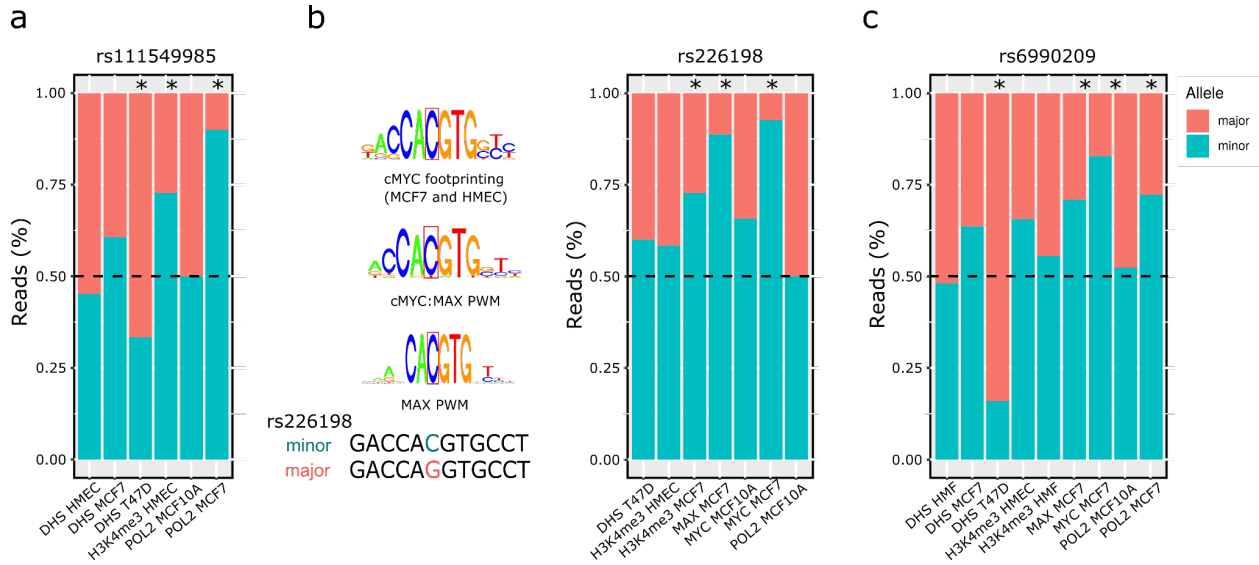

**Figure 6 - Variants at the 5q14.1 risk locus associated with differential transcription factor binding.** Allele-specific analysis of the effect of three candidate risk rSNPs — (a) rs111549985, (b) rs226198, and (c) rs6880209 — on RNA polymerase II (POL2) and transcription factor (TF) binding, DNase I targeting (DHS) and H3K4me3 modification in different heterozygous cell lines. An asterisk indicates statistically significant imbalances (two-sided binomial test,  $p$ -value  $\leq 0.05$ ). Legend: HMEC - human mammary epithelial cells; MCF7 - human breast (adenocarcinoma) cell line; T47D - human breast tumor cell line; MCF10A - human breast epithelial cell line.



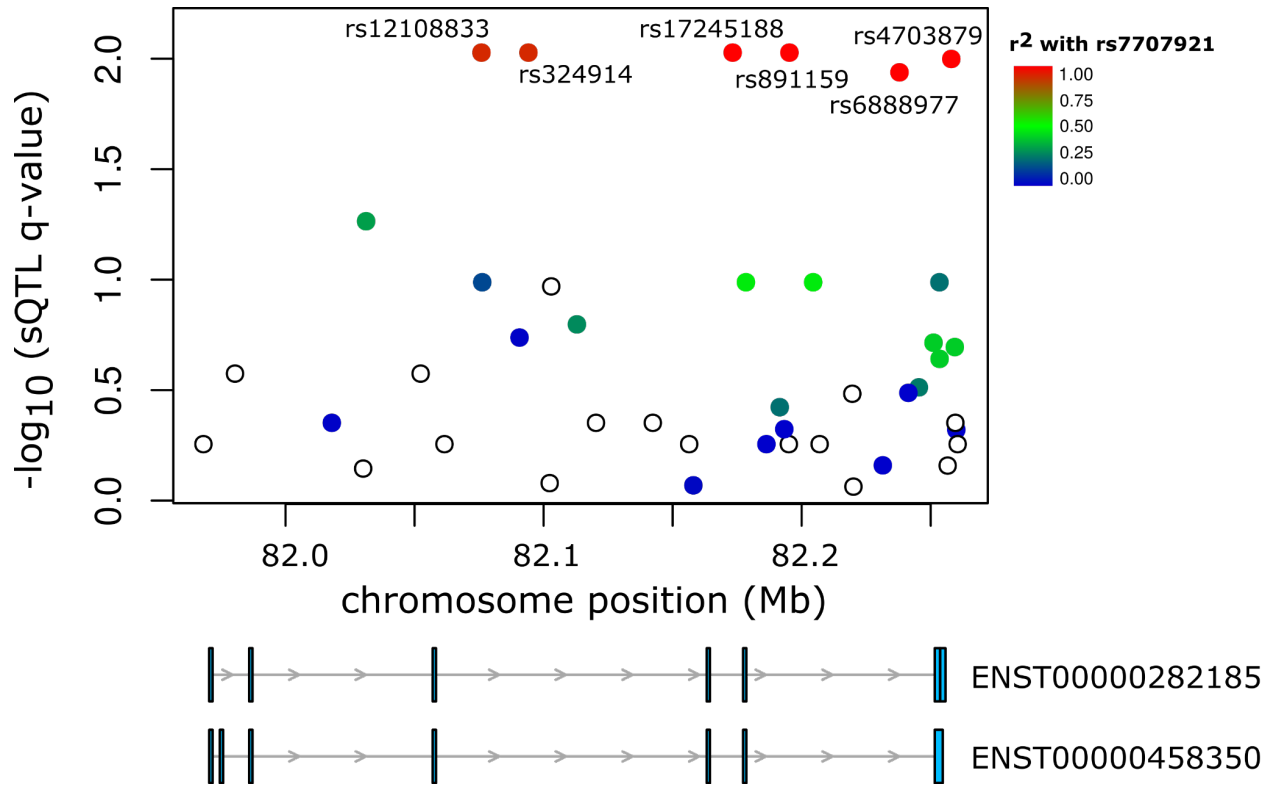

**Figure 7 - Variants at the 5q14.1 risk locus associated with alternative transcription.** Six sQTLs in high LD with rs7707921 were identified for *ATG10*. The  $-\log_{10}(\text{q-value})$  for the sQTL analysis (y-axis) is shown for the 5q14.1-14.2 region (hg38). Color intensity represents the LD ( $r^2$ ) between the analyzed variants and the GWAS lead SNP rs7707921. Below are two *ATG10* transcripts whose expression ratios are associated with the sQTLs.

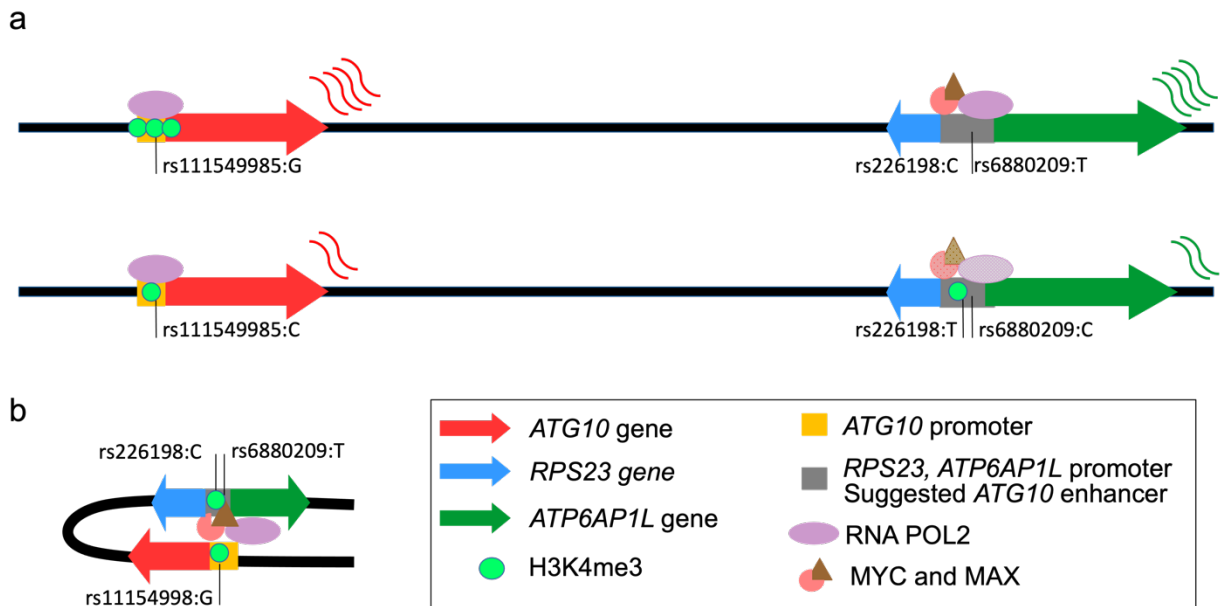

**Figure 8 - Complex risk regulatory landscape of the 5q14.1 locus.** a) Levels of expression of *ATG10* and *ATP6AP1L* genes differ between the haplotypes containing either the minor alleles of rs111549985, rs226198, and rs6880209 (above) or the major ones (below). Colored arrows indicate the direction of transcription of the individual genes, the saturation of the corresponding colors indicates the strength of protein binding, the number of green circles indicates the level of H3K4me3 and the colored curly lines indicate the relative levels of transcript produced. b) Schematic representation of the proposed model for the positive correlation between *ATG10* and *ATP6AP1L* via a shared regulatory region.
