# Supplementary material for: Mapping of cis-regulatory variants by differential allelic expression analysis identifies candidate causal variants and target genes of 41 breast cancer risk loci
Source: bioRxiv or medRxiv preprint supplement (doi:10.1101/2022.03.08.22271889), 2023-09-12
Supplement: Supplementary file [file media-2.pdf]

**Mapping of *cis*-regulatory variants by differential allelic expression analysis identifies candidate risk variants and target genes of 27 breast cancer risk loci**

Joana M. Xavier *et al.*

**Table S1: SNPs associated with BC risk retrieved from GWAS Catalog using a significance threshold for association signals of p-value  $\leq 1.0E-05$ .**

**Access Link:** [Xavier etal 2022 TableS1](#)

**Table S2: Previously reported target genes of *cis*-acting regulatory variation in post-GWAS studies for breast cancer.** Information includes whether daeSNPs were identified for each gene (daeGene) and whether they were reported by GTEx (v7) as having significant association with eQTLs variants (eGenes) in breast mammary tissue.

**Access Link:** [Xavier etal 2022 TableS2](#)

**Table S3: Genomic annotation of aeSNPs.** Annotations were retrieved according to the Ensembl database (GRCh38.p13). daeSNP TRUE corresponds to aeSNPs displaying DAE in at least 3 and 10% of the number\_het\_samples and FALSE to non-daeSNPs.

**Access Link:** [Xavier etal 2022 TableS3](#)

**Table S4: Summary statistics on the bi-allelic differential expression for each aeSNP analysed.** Legend: Number\_samples - total number of samples analysed; number\_het\_samples - number of heterozygous samples; number\_het\_dae\_samples - number of heterozygous samples displaying DAE; proportion\_het\_samples - proportion of heterozygous samples amongst total number of samples; proportion\_het\_dae\_samples - proportion of heterozygous samples showing DAE amongst total number of samples; proportion\_het\_dae\_het\_samples - proportion of heterozygous samples showing DAE amongst heterozygous samples; daeSNP - TRUE corresponds to a daeSNP and FALSE to a non-daeSNP.

**Access Link:** [Xavier etal 2022 TableS4](#)

**Table S5: Mean of the absolute values of AE ratios and genomic location, for each aeSNP analysed.** Legend: daeSNP - TRUE corresponds to a daeSNP and FALSE to a non-daeSNP.

**Access Link:** [Xavier\\_etal\\_2022\\_TableS5](#)

**Table S6: List of identified maeSNPs (SNPs displaying mono-allelic expression) in normal breast tissue.** Local gene(s) corresponds to the gene(s) annotated within 5Kb of the maeSNP.

#Information retrieved from the Geneimprint database: (<https://www.geneimprint.com/site/genes-by-species.Homo+sapiens>) and from Goovaerts et al. 2018.

**Access Link:** [Xavier\\_etal\\_2022\\_TableS6](#)

**Table S7: Annotation of significant daeQTLs.** Mapping Approach corresponds to the approach used in the daeQTL analysis.

**Access Link:** [Xavier\\_etal\\_2022\\_TableS7](#)

**Table S8: Genomic annotation and classification of genes harbouring aeSNPs as daeGenes, eGenes, maeGenes, daeQTLs genes, GWAS risk genes and risk daeQTLs genes. Legend:** daeGene\_Breast - genes which harbour daeSNPs; eGene\_Breast\_Mammary - genes associated with an eQTL variant (GTEx v7); maeGenes\_Breast - genes which harbour maeSNPs; daeQTL\_Gene - genes which harbour daeQTLs variants; gwasGene - genes which harbour GWAS hit variants and their proxies (using an LD  $r^2 \geq 0.4$ ); risk\_daeQTL\_Gene - genes which harbour daeQTLs.

**Access Link:** [Xavier\\_etal\\_2022\\_TableS8](#)

**Table S9: List of candidate risk-rSNPs identified. Legend:** Candidate risk-rSNPs were defined as daeQTLs with an  $r^2 \geq 0.4$  with a BC GWAS hit variant; Mapping Approach

corresponds to the approach used in the daeQTL analysis; Pubmed ID - GWAS\_SNP original publication; R\_squared - LD between the daeQTL and the GWAS\_SNP.

**Access Link:** [Xavier etal 2022 TableS9](#)

**Table S10: List of daeQTLs identified with an  $0.2 \leq r^2 < 0.4$  with a BC GWAS hit variant.**

Legend: daeGene\_hgnc\_symbol - daeSNP gene name; daeQTL\_gene\_hgnc\_symbol - daeQTL gene name; Mapping Approach - approach used in the daeQTL analysis; R\_squared - LD between the daeQTL and the GWAS\_SNP.

**Access Link:** [Xavier etal 2022 TableS10](#)

**Table S11: Ninety-two candidate risk-SNPs identified for the *ATG10* gene.** Genomic location, gene symbol and consequence type are indicated.

**Access Link:** [Xavier etal 2022 TableS11](#)

**Table S12: Allelic miRNA binding predictions for candidate risk SNPs located in the 3'UTR of the *RPS23* gene.** Legend: Mirbase.ID - miRNA ID; Site.Type: type of miRNA binding; UTR.start - start position at the UTR where miRNA is predicted to bind; UTR.end - end position at the UTR where miRNA is predicted to bind; context...score - context++ score for a specific allele given by TargetScan; miRNA.family - family of miRNAs predicted to bind to allele site; Prediction\_allele - SNP allele for which the prediction was obtained; snp\_id - SNP ID; hgnc\_symbol - HGNC gene name; transcript\_id - gene transcript ID; chr\_name - chromosome number of the gene; alleles - alleles of the SNP; minor\_allele - SNP's minor allele; position\_in\_sequence - Position of the SNP allele in the queried UTR sequence; chr\_strand - chromosome strand of the predicted site.

**Access Link:** [Xavier etal 2022 TableS12](#)

**Table S13: sQTL analysis for the ATG10 gene using data from GTEx\_MammaryTissue, TCGA-BRCA\_Primary-Solid-Tumour and TCGA-BRCA\_Solid-Tissue-Normal and carried out with sQTLseeker.** Legend: snplid - SNP name; genelid - gene name; F - F score; nb.groups - the number of genotype groups (2 or 3); md - the maximum difference in relative expression between genotype groups; tr.first/tr.second - the transcript IDs of the two transcripts that change the most (and symmetrically); nb.perms - the number of permutation used for the P-value computation; pvalue - P-values for each pair of gene/SNP testing the association between the genotype and transcript relative expression; R\_squared - LD between the SNP and the GWAS lead SNP rs7707921.

**Access Link:** [Xavier etal 2022 TableS13](#)

**Table S14: CLIP data of bound RBPs at two candidate risk-rSNPs for the *ATG10* gene.**

| SNP id      | Ref allele | Alt allele | SNP position           | RBP           | Tissue type | RBP occupancy Position | Strand | CLIP-seq technology and peak calling method | Score  | Phast Cons score | Phylo P score | Data accession |
|-------------|------------|------------|------------------------|---------------|-------------|------------------------|--------|---------------------------------------------|--------|------------------|---------------|----------------|
| rs111549985 | C          | G          | chr5:81972250-81972251 | RBP_occupancy | HeLa        | chr5:81972249-81972269 | +      | PIP-seq                                     | 443.53 | 0.354            | 0.267         | GSE49309       |
| rs111549985 | C          | G          | chr5:81972250-81972251 | XRN2          | K562        | chr5:81972185-81972280 | +      | eCLIP                                       | 3.24   | 0.133            | -0.043        | ENCODE         |
| rs6884232   | G          | A          | chr5:82254223-82254224 | IGF2BP1       | K562        | chr5:82254109-82254296 | +      | eCLIP                                       | 3.02   | 0.027            | 0.091         | ENCODE         |

**Table S15: Allele-specific RNA Binding Proteins (RBP) predictions for two variants located at *ATG10*.** Alleles are indicated in the order of reference/alternative. RBP\_map\_Ref and RBP\_map\_Alt indicate the predicted RBP name next to the predicted binding position (the variant is located at position 31) and p-value is an estimate from a normal one-tailed distribution of the Z-score.

| rs_id       | allele | CLIP binding_RB P_Var | riboSNitch_RBP_Var | RBP_map_Ref                                                             | RBP_map_Alt                                                      |
|-------------|--------|-----------------------|--------------------|-------------------------------------------------------------------------|------------------------------------------------------------------|
| rs111549985 | C/G    | Y                     | Y                  | SRSF2 (26, 4.78e-02)   SRSF2 (29, 4.99e-02)                             | FUS (28, 6.11e-03)   MBNL1 (30, 4.59e-02)   PPRC1 (27, 4.29e-03) |
| rs6884232   | G/A    | Y                     | Y                  | BRUNOL4 (30, 1.53e-02)   BRUNOL5 (30, 5.78e-03)   TARDBP (30, 2.48e-02) | TRA2B (31, 3.59e-02)                                             |

**Table S16: Candidate risk-rSNPs for the *ATG10* gene located in regions annotated as promoter and/or enhancers.** LD (measured by  $r^2$ ) values between the candidate risk rSNPs and the GWAS lead SNP rs7707921, the p-values from the binomial test and the q-values after correction for multiple testing are indicated.

| SNP         | LD   | Nearest Gene    | Functional class | DHSs                    | Protein binding                       | Chromatin States                          | Min daeQTL p-value    | Min daeQTL q-value | Regulome Score |
|-------------|------|-----------------|------------------|-------------------------|---------------------------------------|-------------------------------------------|-----------------------|--------------------|----------------|
| rs111549985 | 0.92 | <i>ATG10</i>    | 5'UTR            | Mcf7; T47d; Hmec        | POL2 in Mcf7 and Mcf10A; E2F1 in Mcf7 | HMEC_ProA; vHMEC_TssA; BR.MYO_TssA        | 2.67e-06 (rs17243791) | 8.71e-02           | 2b             |
| rs226203    | 0.62 | <i>RPS23</i>    | 3'UTR            | Hmec                    | POL2 in Mcf7                          | -                                         | 1.71e-04 (rs3738)     | 7.87e-02           | 2b             |
| rs226198    | 0.91 | <i>RPS23</i>    | intron           | Mcf7; T47d; Hmec; vHMEC | POL2 and cMYC in Mcf7 and Mcf10A      | BR.MYO,1_TssA; vHMEC,1_TssA; HMEC,1_TssA; | 1.14e-05 (rs226205)   | 3.40e-02           | 1a             |
| rs6880209   | 0.64 | <i>RPS23</i>    | 5'UTR            | Mcf7; T47d; Hmec        | POL2 and cMYC in Mcf7 and Mcf10A      | HMEC_ProA; BR.H35_TsSA; BR.MYO_TssA       | 2.69e-04              | 9.70e-02           | 1f             |
| rs11325430  | 0.64 | <i>RPS23</i>    | 5'UTR            | Mcf7; T47d; hmec        | POL2 and cMYC in Mcf10A; E2F1 in Mcf7 | BR.MYO,1_TssA; vHMEC,1_TssA; HMEC,1_TssA; | 5.36e-04 (rs226202)   | 1.36e-01           | 2b             |
| rs17247678  | 0.72 | <i>ATP6AP1L</i> | intergenic       | Hmec                    | STAT3 and FOS in Mcf10A               | Active enhancer in HMEC, vHMEC and BR.MYO | 1.14e-05              | 6.52e-02           | 1a             |

**Table S17: Allele-specific epigenetic modifications and transcription factors binding information at three candidate risk-rSNPs.** Fold-change corresponds to the ratio between the number of counts at the major allele by the number of counts at the minor allele. The significance from the binomial test before (p-value) and after (q-value) correction for multiple testing are indicated.

[Access Link: Xavier etal 2022 TableS17](#)



## References

- Ahmed S, Thomas G, Ghousaini M, Healey CS, Humphreys MK, Platte R, et al. Newly discovered breast cancer susceptibility loci on 3p24 and 17q23.2. *Nat Genet.* 2009 May;41(5):585-90.
- Ahsan H, Halpern J, Kibriya MG, Pierce BL, Tong L, Gamazon E, et al. A genome-wide association study of early-onset breast cancer identifies PFKM as a novel breast cancer gene and supports a common genetic spectrum for breast cancer at any age. *Cancer Epidemiol Biomarkers Prev.* 2014 Apr;23(4):658-69.
- Antoniou AC, Wang X, Fredericksen ZS, McGuffog L, Tarrell R, Sinilnikova OM, et al. A locus on 19p13 modifies risk of breast cancer in BRCA1 mutation carriers and is associated with hormone receptor-negative breast cancer in the general population. *Nat Genet.* 2010 Oct;42(10):885-92.
- Baxter JS, Leavy OC, Dryden NH, Maguire S, Johnson N, Fedele V, et al. Capture Hi-C identifies putative target genes at 33 breast cancer risk loci. *Nat Commun.* 2018 Mar 12;9(1):1028.
- Betts JA, Moradi Marjaneh M, Al-Ejeh F, Lim YC, Shi W, et al. Long Noncoding RNAs CUPID1 and CUPID2 Mediate Breast Cancer Risk at 11q13 by Modulating the Response to DNA Damage. *Am J Hum Genet.* 2017 Aug 3;101(2):255-266.
- Bojesen SE, Pooley KA, Johnatty SE, Beesley J, Michailidou K, Tyrer JP, et al. Multiple independent variants at the TERT locus are associated with telomere length and risks of breast and ovarian cancer. *Nat Genet.* 2013 Apr;45(4):371-84, 384e1-2.
- Cai Q, Long J, Lu W, Qu S, Wen W, Kang D, et al. Genome-wide association study identifies breast cancer risk variant at 10q21.2: results from the Asia Breast Cancer Consortium. *Hum Mol Genet.* 2011 Dec 15;20(24):4991-9.
- Cai Q, Zhang B, Sung H, Low SK, Kweon SS, Lu W, et al. Genome-wide association analysis in East Asians identifies breast cancer susceptibility loci at 1q32.1, 5q14.3 and 15q26.1. *Nat Genet.* 2014 Aug;46(8):886-90.
- Chen F, Chen GK, Stram DO, Millikan RC, Ambrosone CB, John EM, et al. A genome-wide association study of breast cancer in women of African ancestry. *Hum Genet.* 2013 Jan;132(1):39-48.
- Couch FJ, Wang X, McGuffog L, Lee A, Olswold C, Kuchenbaecker KB, et al. Genome-wide association study in BRCA1 mutation carriers identifies novel loci associated with breast and ovarian cancer risk. *PLoS Genet.* 2013;9(3):e1003212.
- Couch FJ, Kuchenbaecker KB, Michailidou K, Mendoza-Fandino GA, Nord S, Lilyquist J, et al. Identification of four novel susceptibility loci for oestrogen receptor negative breast cancer. *Nat Commun.* 2016 Apr 27;7:11375.
- Cowper-Salari R, Zhang X, Wright JB, Bailey SD, Cole MD, Eeckhoute J, Moore JH, Lupien M. Breast cancer risk-associated SNPs modulate the affinity of chromatin for FOXA1 and alter gene expression. *Nat Genet.* 2012 Nov;44(11):1191-8.
- Darabi H, McCue K, Beesley J, Michailidou K, Nord S, Kar S, et al. Polymorphisms in a Putative Enhancer at the 10q21.2 Breast Cancer Risk Locus Regulate NRBF2 Expression. *Am J Hum Genet.* 2015 Jul 2;97(1):22-34.
- Dunning AM, Michailidou K, Kuchenbaecker KB, Thompson D, French JD, Beesley J, et al. Breast cancer risk variants at 6q25 display different phenotype associations and regulate ESR1, RMND1 and CCDC170. *Nat Genet.* 2016 Apr;48(4):374-86.
- Easton DF, Pooley KA, Dunning AM, Pharoah PD, Thompson D, Ballinger DG, et al. Genome-wide association study identifies novel breast cancer susceptibility loci. *Nature* 2007 Jun 28;447(7148):1087-93.
- Elgazzar S, Zembutsu H, Takahashi A, Kubo M, Aki F, Hirata K, Takatsuka Y, Okazaki M, Ohsumi S,

Yamakawa T, Sasa M, Katagiri T, Miki Y, Nakamura Y. A genome-wide association study identifies a genetic variant in the SIAH2 locus associated with hormonal receptor-positive breast cancer in Japanese. *J Hum Genet.* 2012 Dec;57(12):766-71.

Fachal L, Aschard H, Beesley J, Barnes DR, Allen J, Kar S, et al. Fine-mapping of 150 breast cancer risk regions identifies 191 likely target genes. *Nat Genet.* 2020 Jan;52(1):56-73.

Fejerman L, Ahmadiyah N, Hu D, Huntsman S, Beckman KB, Caswell JL, Tsung K, John EM, Torres-Mejia G, Carvajal-Carmona L, Echeverry MM, Tuazon AM, Ramirez C; COLUMBUS Consortium, Gignoux CR, Eng C, Gonzalez-Burchard E, Henderson B, Le Marchand L, Haryono SJ, Datasena IG, Santosa WB, Mulyarahardja R, Sari K. A pilot genome-wide association study of breast cancer susceptibility loci in Indonesia. *Asian Pac J Cancer Prev.* 2015;16(6):2231-5.

Fletcher O, Johnson N, Orr N, Hosking FJ, Gibson LJ, Walker K, et al. Novel breast cancer susceptibility locus at 9q31.2: results of a genome-wide association study. *J Natl Cancer Inst.* 2011 Mar 2;103(5):425-35.

French JD, Ghousaini M, Edwards SL, Meyer KB, Michailidou K, Ahmed S, et al. Functional variants at the 11q13 risk locus for breast cancer regulate cyclin D1 expression through long-range enhancers. *Am J Hum Genet.* 2013 Apr 4;92(4):489-503.

Gaudet MM, Kuchenbaecker KB, Vijai J, Klein RJ, Kirchhoff T, McGuffog L, et al. Identification of a BRCA2-specific modifier locus at 6p24 related to breast cancer risk. *PLoS Genet.* 2013; 9(3):e1003173.

Garcia-Closas M, Couch FJ, Lindstrom S, Michailidou K, Schmidt MK, Brook MN, et al. Genome-wide association studies identify four ER negative-specific breast cancer risk loci. *Nat Genet.* 2013 Apr;45(4):392-8, 398e1-2.

Ghousaini M, Edwards SL, Michailidou K, Nord S, Cowper-Sal Lari R, et al. Evidence that breast cancer risk at the 2q35 locus is mediated through IGFBP5 regulation. *Nat Commun.* 2014 Sep 23;4:4999.

Ghousaini M, French JD, Michailidou K, Nord S, Beesley J, Canisus S, et al. Evidence that the 5p12 Variant rs10941679 Confers Susceptibility to Estrogen-Receptor-Positive Breast Cancer through FGF10 and MRPS30 Regulation. *Am J Hum Genet.* 2016 Oct 6;99(4):903-911.

Glubb DM, Maranian MJ, Michailidou K, Pooley KA, Meyer KB, Kar S, et al. Fine-scale mapping of the 5q11.2 breast cancer locus reveals at least three independent risk variants regulating MAP3K1. *Am J Hum Genet.* 2015 Jan 8;96(1):5-20.

Gold B, Kirchhoff T, Stefanov S, Lautenberger J, Viale A, Garber J, et al. Genome-wide association study provides evidence for a breast cancer risk locus at 6q22.33. *Proc Natl Acad Sci U S A.* 2008 Mar 18;105(11):4340-5.

Guo X, Long J, Zeng C, Michailidou K, Ghousaini M, Bolla MK, et al. Fine-scale mapping of the 4q24 locus identifies two independent loci associated with breast cancer risk. *Cancer Epidemiol Biomarkers Prev.* 2015 Nov;24(11):1680-91.

Haiman CA, Chen GK, Vachon CM, Canzian F, Dunning A, Millikan RC, et al. A common variant at the TERT-CLPTM1L locus is associated with estrogen receptor-negative breast cancer. *Nat Genet.* 2011 Oct 30;43(12):1210-4.

Hamdi Y, Soucy P, Adoue V, Michailidou K, Canisius S, Lemaçon A, et al. Association of breast cancer risk with genetic variants showing differential allelic expression: Identification of a novel breast cancer susceptibility locus at 4q21. *Oncotarget.* 2016 Dec 6;7(49):80140-80163.

Han MR, Long J, Choi JY, Low SK, Kweon SS, Zheng Y, et al. Genome-wide association study in East Asians identifies two novel breast cancer susceptibility loci. *Hum Mol Genet.* 2016 Aug 1;25(15):3361-3371.

Helbig S, Wockner L, Bouendeu A, Hille-Betz U, McCue K, French JD, Edwards SL, Pickett HA, Reddel

RR, Chenevix-Trench G, Dörk T, Beesley J. Functional dissection of breast cancer risk-associated *TERT* promoter variants. *Oncotarget*. 2017 May 26;8(40):67203-67217.

Hunter DJ, Kraft P, Jacobs KB, Cox DG, Yeager M, Hankinson SE, et al. A genome-wide association study identifies alleles in *FGFR2* associated with risk of sporadic postmenopausal breast cancer. *Nat Genet*. 2007 Jul;39(7):870-4.

Huo D, Feng Y, Haddad S, Zheng Y, Yao S, Han YJ, et al. Genome-wide association studies in women of African ancestry identified 3q26.21 as a novel susceptibility locus for oestrogen receptor negative breast cancer. *Hum Mol Genet*. 2016 Nov 1;25(21):4835-4846.

Jacinta-Fernandes A, Xavier JM, Magno R, Lage JG, Maia AT. Allele-specific miRNA-binding analysis identifies candidate target genes for breast cancer risk. *NPJ Genom Med*. 2020 Feb 13;5:4.

Kim HC, Lee JY, Sung H, Choi JY, Park SK, Lee KM, et al. A genome-wide association study identifies a breast cancer risk variant in *ERBB4* at 2q34: results from the Seoul Breast Cancer Study. *Breast Cancer Res*. 2012 Mar 27;14(2):R56.

Kooperberg C, Hou L, Agalliu I, Kraft P, Lindström S, Perez-Stable EJ, Haiman CA, Ziv E. Genome-wide association study of breast cancer in Latinas identifies novel protective variants on 6q25. *Nat Commun*. 2014 Oct 20;5:5260.

Lawrenson K, Kar S, McCue K, Kuchenbaecker K, Michailidou K, Tyrer J, et al. Functional mechanisms underlying pleiotropic risk alleles at the 19p13.1 breast-ovarian cancer susceptibility locus. *Nat Commun*. 2016 Sep 7;7:12675.

Li J, Humphreys K, Heikkinen T, Aittomäki K, Blomqvist C, Pharoah PD, et al. A combined analysis of genome-wide association studies in breast cancer. *Breast Cancer Res Treat*. 2011 Apr;126(3):717-27.

Lin WY, Camp NJ, Ghousaini M, Beesley J, Michailidou K, Hopper JL, et al. Identification and characterization of novel associations in the *CASP8/ALS2CR12* region on chromosome 2 with breast cancer risk. *Hum Mol Genet*. 2015 Jan 1;24(1):285-98.

Long J, Cai Q, Shu XO, Qu S, Li C, Zheng Y, et al. Identification of a functional genetic variant at 16q12.1 for breast cancer risk: results from the Asia Breast Cancer Consortium. *PLoS Genet*. 2010 Jun 24;6(6):e1001002.

Long J, Cai Q, Sung H, Shi J, Zhang B, Choi JY, et al. Genome-wide association study in east Asians identifies novel susceptibility loci for breast cancer. *PLoS Genet*. 2012;8(2):e1002532.

Low SK, Takahashi A, Ashikawa K, Inazawa J, Miki Y, Kubo M, Nakamura Y, Katagiri T. Genome-wide association study of breast cancer in the Japanese population. *PLoS One*. 2013 Oct 15;8(10):e76463.

Meyer KB, Maia AT, O'Reilly M, Teschendorff AE, Chin SF, Caldas C, Ponder BA.

Allele-specific up-regulation of *FGFR2* increases susceptibility to breast cancer. *PLoS Biol*. 2008 May 6;6(5):e108.

Meyer KB, O'Reilly M, Michailidou K, Carlebur S, Edwards SL, French JD, et al. Fine-scale mapping of the *FGFR2* breast cancer risk locus: putative functional variants differentially bind *FOXA1* and *E2F1*. *Am J Hum Genet*. 2013 Dec 5;93(6):1046-60.

Michailidou K, Hall P, Gonzalez-Neira A, Ghousaini M, Dennis J, Milne RL, et al. Large-scale genotyping identifies 41 new loci associated with breast cancer risk. *Nat Genet*. 2013 Apr;45(4):353-61, 361e1-2.

Michailidou K, Beesley J, Lindstrom S, Canisius S, Dennis J, Lush MJ, et al. Genome-wide association analysis of more than 120,000 individuals identifies 15 new susceptibility loci for breast cancer. *Nat Genet*. 2015 Apr;47(4):373-80.

Michailidou K, Lindström S, Dennis J, Beesley J, Hui S, Kar S, et al. Association analysis identifies 65 new breast cancer risk loci. *Nature*. 2017 Nov 2;551(7678):92-94.

Milne RL, Kuchenbaecker KB, Michailidou K, Beesley J, Kar S, Lindström S, et al. Identification of ten variants associated with risk of estrogen-receptor-negative breast cancer. *Nat Genet.* 2017 Dec;49(12):1767-1778.

Murabito JM, Rosenberg CL, Finger D, Kreger BE, Levy D, Splansky GL, Antman K, Hwang SJ. A genome-wide association study of breast and prostate cancer in the NHLBI's Framingham Heart Study. *BMC Med Genet.* 2007 Sep 19;8 Suppl 1(Suppl 1):S6.

Orr N, Lemnrau A, Cooke R, Fletcher O, Tomczyk K, Jones M, et al. Genome-wide association study identifies a common variant in RAD51B associated with male breast cancer risk. *Nat Genet.* 2012 Nov;44(11):1182-4.

Orr N, Dudbridge F, Dryden N, Maguire S, Novo D, Perrakis E, et al. Fine-mapping identifies two additional breast cancer susceptibility loci at 9q31.2. *Hum Mol Genet.* 2015 May 15;24(10):2966-84.

Palomba G, Loi A, Porcu E, Cossu A, Zara I, Budroni M, Dei M, Lai S, Mulas A, Olmeo N, Ionta MT, Atzori F, Cuccuru G, Pitzalis M, Zoledziewska M, Olla N, Lovicu M, Pisano M, Abecasis GR, Uda M, Tanda F, Michailidou K, Easton DF, Chanock SJ, Hoover RN, Hunter DJ, Schlessinger D, Sanna S, Crisponi L, Palmieri G. Genome-wide association study of susceptibility loci for breast cancer in Sardinian population. *BMC Cancer* 2015 May 10;15:383.

Pande M, Joon A, Brewster AM, Chen WV, Hopper JL, Eng C, et al. Genetic susceptibility markers for a breast-colorectal cancer phenotype: Exploratory results from genome-wide association studies. *PLoS One.* 2018 Apr 26;13(4):e0196245.

Quigley DA, Fiorito E, Nord S, Van Loo P, Alnæs GG, Fleischer T, et al. The 5p12 breast cancer susceptibility locus affects MRPS30 expression in estrogen-receptor positive tumors. *Mol Oncol.* 2014 Mar;8(2):273-84.

Rinella ES, Shao Y, Yackowski L, Pramanik S, Oratz R, Schnabel F, Guha S, LeDuc C, Campbell CL, Klugman SD, Terry MB, Senie RT, Andrulis IL, Daly M, John EM, Roses D, Chung WK, Ostrer H. Genetic variants associated with breast cancer risk for Ashkenazi Jewish women with strong family histories but no identifiable BRCA1/2 mutation. *Hum Genet.* 2013 May;132(5):523-36.

Sehrawat B, Sridharan M, Ghosh S, Robson P, Cass CE, Mackey JR, Greiner R, Damaraju S. Potential novel candidate polymorphisms identified in genome-wide association study for breast cancer susceptibility. *Hum Genet.* 2011 Oct;130(4):529-37.

Shi J, Zhang Y, Zheng W, Michailidou K, Ghoussaini M, Bolla MK, et al. Fine-scale mapping of 8q24 locus identifies multiple independent risk variants for breast cancer. *Int J Cancer.* 2016 Sep 15;139(6):1303-1317.

Siddiq A, Couch FJ, Chen GK, Lindström S, Eccles D, Millikan RC, et al. A meta-analysis of genome-wide association studies of breast cancer identifies two novel susceptibility loci at 6q14 and 20q11. *Hum Mol Genet.* 2012 Dec 15;21(24):5373-84.

Song C, Chen GK, Millikan RC, Ambrosone CB, John EM, Bernstein L, et al. A genome-wide scan for breast cancer risk haplotypes among African American women. *PLoS One.* 2013;8(2):e57298.

Stacey SN, Manolescu A, Sulem P, Rafnar T, Gudmundsson J, Gudjonsson SA, et al. Common variants on chromosomes 2q35 and 16q12 confer susceptibility to estrogen receptor-positive breast cancer. *Nat Genet.* 2007 Jul;39(7):865-9.

Stacey SN, Sulem P, Zanon C, Gudjonsson SA, Thorleifsson G, Helgason A, et al. Ancestry-shift refinement mapping of the C6orf97-ESR1 breast cancer susceptibility locus. *PLoS Genet.* 2010 Jul 22;6(7):e1001029.

Sun Y, Ye C, Guo X, Wen W, Long J, Gao YT, Shu XO, Zheng W, Cai Q. Evaluation of potential regulatory function of breast cancer risk locus at 6q25.1. *Carcinogenesis.* 2016 Feb;37(2):163-168.

Thomas G, Jacobs KB, Kraft P, Yeager M, Wacholder S, Cox DG, et al. A multistage genome-wide association study in breast cancer identifies two new risk alleles at 1p11.2 and 14q24.1 (RAD51L1). *Nat Genet.* 2009 May;41(5):579-84.

Turnbull C, Ahmed S, Morrison J, Pernet D, Renwick A, Maranian M, et al. Genome-wide association study identifies five new breast cancer susceptibility loci. *Nat Genet.* 2010 Jun;42(6):504-7.

Wang Y, He Y, Qin Z, Jiang Y, Jin G, Ma H, Dai J, Chen J, Hu Z, Guan X, Shen H. Evaluation of functional genetic variants at 6q25.1 and risk of breast cancer in a Chinese population. *Breast Cancer Res.* 2014 Aug 14;16(4):422.

Wynendaele J, Böhnke A, Leucci E, Nielsen SJ, Lambertz I, Hammer S, et al. An illegitimate microRNA target site within the 3' UTR of MDM4 affects ovarian cancer progression and chemosensitivity. *Cancer Res.* 2010 Dec 1;70(23):9641-9.

Wyszynski A, Hong CC, Lam K, Michailidou K, Lytle C, Yao S, et al. An intergenic risk locus containing an enhancer deletion in 2q35 modulates breast cancer risk by deregulating IGFBP5 expression. *Hum Mol Genet.* 2016 Sep 1;25(17):3863-3876.

Zeng C, Guo X, Long J, Kuchenbaecker KB, Droit A, Michailidou K, et al. Identification of independent association signals and putative functional variants for breast cancer risk through fine-scale mapping of the 12p11 locus. *Breast Cancer Res.* 2016 Jun 21;18(1):64.

Zheng W, Long J, Gao YT, Li C, Zheng Y, Xiang YB, Wen W, Levy S, Deming SL, Haines JL, Gu K, Fair AM, Cai Q, Lu W, Shu XO. Genome-wide association study identifies a new breast cancer susceptibility locus at 6q25.1. *Nat Genet.* 2009 Mar;41(3):324-8.
